# Supplementary material
Source: PubMed Central journal article supplement (PMC3831489)
Supplement: 1314608110_sapp.pdf [file 1314608110_sapp.pdf]

Supporting Information for

## **Landscape of somatic mutations and clonal evolution in mantle cell lymphoma**

Sílvia Beà<sup>1</sup>, Rafael Valdés-Mas<sup>2</sup>, Alba Navarro<sup>1</sup>, Itziar Salaverria<sup>1</sup>, David Martín-García<sup>1</sup>, Pedro Jares<sup>1,3</sup>, Eva Giné<sup>4</sup>, Magda Pinyol<sup>5</sup>, Cristina Royo<sup>1</sup>, Ferran Nadeu<sup>1</sup>, Laura Conde<sup>1</sup>, Manel Juan<sup>6</sup>, Guillem Clot<sup>1</sup>, Pedro Vizán<sup>7</sup>, Luciano Di Croce<sup>7</sup>, Diana A. Puente<sup>2</sup>, Mónica López-Guerra<sup>1</sup>, Alexandra Moros<sup>1</sup>, Gael Roue<sup>1</sup>, Marta Aymerich<sup>1</sup>, Neus Villamor<sup>1</sup>, Lluís Colomo<sup>1,3</sup>, Antonio Martínez<sup>1,3</sup>, Alexandra Valera<sup>1</sup>, José I. Martín-Subero<sup>1,3</sup>, Virginia Amador<sup>1</sup>, Luis Hernández<sup>1</sup>, Maria Rozman<sup>1</sup>, Anna Enjuanes<sup>5</sup>, Pilar Forcada<sup>8</sup>, Ana Muntañola<sup>8</sup>, Elena M. Hartmann<sup>9</sup>, María J. Calasanz<sup>10</sup>, Andreas Rosenwald<sup>9</sup>, German Ott<sup>11</sup>, Jesús M. Hernández-Rivas<sup>12</sup>, Wolfram Klapper<sup>13</sup>, Reiner Siebert<sup>14</sup>, Adrian Wiestner<sup>15</sup>, Wyndham H. Wilson<sup>16</sup>, Dolors Colomer<sup>1</sup>, Armando López-Guillermo<sup>4</sup>, Carlos López-Otín<sup>2\*</sup>, Xose S. Puente<sup>2\*</sup> & Elías Campo<sup>1,3\*</sup>

To whom correspondence should be addressed: [SBEA@clinic.ub.es](mailto:SBEA@clinic.ub.es) (S.B.), [xspuente@uniovi.es](mailto:xspuente@uniovi.es) (X.S.P.) and [ECAMPO@clinic.ub.es](mailto:ECAMPO@clinic.ub.es) (E.C.)

## Contents of this PDF file:

|                                                                                                  |    |
|--------------------------------------------------------------------------------------------------|----|
| Materials and Methods.....                                                                       | 4  |
| <u>Figure S1</u> : WGS mutations .....                                                           | 9  |
| <u>Figure S2</u> : Mutation distribution and rainfall plots by WGS.....                          | 10 |
| <u>Figure S3</u> : Chromosomal imbalances.....                                                   | 12 |
| <u>Figure S4</u> : <i>BIRC3</i> and <i>ATM</i> mutations related to 11q.....                     | 13 |
| <u>Figure S5</u> : <i>ATM</i> gene mutation distribution.....                                    | 14 |
| <u>Figure S6</u> : <i>CCND1</i> gene mutation distribution.....                                  | 15 |
| <u>Figure S7</u> : Landscape of genetic variation in MCL.....                                    | 16 |
| <u>Figure S8</u> : GSEA of <i>WHSC1</i> -mutated and -unmutated cases.....                       | 17 |
| <u>Figure S9</u> : <i>MLL2</i> gene mutation distribution.....                                   | 18 |
| <u>Figure S10</u> : <i>MEF2B</i> gene mutation distribution.....                                 | 19 |
| <u>Figure S11</u> : Secretion of IL-8 in <i>TLR2</i> -mutated and -unmutated tumors.....         | 20 |
| <u>Figure S12</u> : GSEA of <i>NOTCH2</i> -mutated and -unmutated cases.....                     | 21 |
| <u>Figure S13</u> : OS of MCL patients according to <i>NOTCH2</i> and <i>TP53</i> mutations..... | 22 |
| <u>Figure S14</u> : <i>NOTCH1</i> gene mutation distribution.....                                | 23 |
| <u>Figure S15</u> : OS of MCL patients with <i>NOTCH1</i> -mutated or -unmutated.....            | 24 |

|                                                                                          |    |
|------------------------------------------------------------------------------------------|----|
| <u>Figure S16</u> : Mutational analysis in progressed and synchronic samples.....        | 25 |
| <u>Table S1</u> : Details of the 29 MCL patients analyzed by WGS and/or WES.....         | 26 |
| <u>Table S2</u> : Clinicobiological features of the 4 patients analyzed by WGS.....      | 28 |
| <u>Table S3</u> : Clinicobiological features of the 29 MCL patients.....                 | 29 |
| <u>Table S4</u> : Characteristics of the six MCL cell lines analyzed by WES.....         | 30 |
| <u>Table S5</u> : Statistics of WGS samples.....                                         | 31 |
| <u>Table S6</u> : Statistics of WES samples.....                                         | 32 |
| <u>Table S7</u> : Breakpoints of t(11;14)(q13;q32) translocation by WGS.....             | 34 |
| <u>Table S8</u> : Kataegis in MCL.....                                                   | 35 |
| <u>Table S9</u> : MCL mutations identified by WES and Sanger sequencing.....             | 36 |
| <u>Table S10</u> : Regions of CN and CNN-LOH identified in the 29 MCL.....               | 38 |
| <u>Table S11</u> : Recurrently mutated genes of the 29 MCL analyzed by WES.....          | 48 |
| <u>Table S12</u> : Differentially expressed genes according to <i>WHSC1</i> status ..... | 49 |
| <u>Table S13</u> : Primers used for Sanger sequencing.....                               | 52 |
| References.....                                                                          | 53 |

## **SI Materials and Methods**

**Patients and samples.** We studied 29 patients with mantle cell lymphoma (MCL) (1), who had given informed consent in agreement with the Institutional Review Board of Hospital Clínic (Barcelona, Spain) for sample collection and analysis following the guidelines of the International Cancer Genome Consortium (2). Informed consent to participate in the study was obtained according to the guidelines of the local Ethic Committees. Four patients were selected for whole-genome sequencing (WGS) and all 29 cases were studied by whole-exome sequencing (WES). Clinical and biological characteristics of these patients are summarized in Tables S1-S3. Twenty-six tumors were studied at diagnosis or previous to treatment and three at relapse. Additional independent tumor samples of eight patients were analyzed by WGS (n=2) or WES (n=8). Six of them were obtained synchronically from two different topographic sites whereas in two patients the samples were obtained sequentially at two different time points (Table S1). Constitutional DNA was obtained from normal peripheral blood in all patients. Additionally, six well characterized MCL cell lines were analyzed by WES (Table S4). An additional cohort of 172 MCL patients and 3 MCL cell lines were used for clinical and mutational validation of selected genes (Table S3-S4). The study was approved by the Institutional Review Board of Hospital Clínic (Barcelona, Spain).

For WES analysis, a total of 37 tumor samples were obtained from PB (n=22), lymph nodes (n=12), or other involved tissues (tonsil, spleen, colon, n=3). Peripheral blood tumor cells were purified using an immunomagnetic method previously described (3, 4). Tumor cell purity was  $\geq 80\%$  as assessed by flow cytometry. Normal cells were purified from blood in all patients and had no detectable or less than 4% tumor cells also assessed by flow cytometry. Tumor DNA was extracted using appropriate Qiagen kits (Qiagen) as previously described (5).

**Rainfall plots and *Kataegis*.** Rainfall plots based on WGS data were constructed by computing the distance between one somatic mutation to the previous one (6). *Kataegis* in MCL was defined as regions containing at least five independent somatic mutations in less than 1 Kb. Rainfalls were considered when there was a cluster of proximal mutations between 1 and 10,000 bases ( $\log_{10}$  distance between 0-4).

**Clonal evolution analyses.** To identify the subclonal architectural evolution from WES data, the frequency of reads supporting the mutated allele was calculated for each somatic substitution. Only positions with a minimum depth of coverage of 20, and not present in regions of copy number alterations (CNA) were considered for clustering analysis. Three different clusters of mutations were considered: i) shared and stable mutations among both samples; ii) mutations specific of the first sample; and iii) mutations identified only in the second sample. All mutations were used to compute the clusters but only the protein-coding mutations were used for graphical representation of the results.

***IGHV* mutational status and *SOX11* expression.** *IGHV-IGHD-IGHJ* rearrangements and mutational status were analyzed using leader or consensus primers for the *IGHV* FR1 along with appropriate consensus primers, as previously described (5). Sequences with  $\geq 97\%$  identity to the germ line were considered unmutated (5, 7). *SOX11* expression was evaluated either by quantitative RT-PCR or immunohistochemistry and categorized as positive or negative as previously described (5).

**Sanger sequencing validation.** *TP53*, *WHSC1*, *BIRC3*, *NOTCH2*, *NOTCH1*, *MEF2B*, *TLR2* and *B2M* genes were investigated in an expanded cohort of patients by PCR followed by direct Sanger sequencing. Oligonucleotide primers for PCR amplification were designed using Primer 3. Primers used are specified in Table S13. Sequences were analyzed with the Mutation Surveyor® (Softgenetics).

**SNP-arrays.** Samples were genotyped using Affymetrix SNP6.0 microarrays (Affymetrix) according to the manufacturer's instructions as previously described (5). Copy number data from SNP6.0 were visualized and analyzed using Nexus CN 6.0 Discovery Edition (Biodiscovery). All alterations were visually inspected by two different observers (I.S. and S.B). Alterations were cross-checked in the copy number variation database (<http://projects.tcag.ca/variation/>). Copy number neutral-loss of heterozygosity (CNN-LOH) was considered when the size of the altered region was >5Mb. According to the literature, cases were considered to have chromothripsis when at least ten switches between two or more copy number states were apparent on an individual chromosome (8). CNA were also analyzed from WES data with a method previously described (9) and compared to SNP-array data.

**Gene expression profiling.** Total RNA was extracted with the TRIzol reagent following the recommendations of the manufacturer (Life Technologies). RNA integrity was examined with the Agilent 2100 Bioanalyzer (Agilent Technologies) and only high quality RNA samples were hybridized to Gene Chip Human Genome U133 plus 2.0 arrays, according to Affymetrix standard protocols. The analysis of the scanned images and the determination of the detection call for each probe set of the array were obtained with the Affymetrix Genechip Command Console. Summarized expression values were computed using the robust multichip average approach implemented in the Expression Console Software (Affymetrix). Differential expression analysis among *WHSC1* and *NOTCH2* -mutated and -unmutated MCL was performed by a multivariate permutation test implemented in the BRB-tool application. We used the multivariate permutation test to provide 90% confidence that the false discovery rate was less than 5%. Enrichment pathway analysis was performed using the GSEA desktop application (GSEA, Broad Institute at MIT:

<http://www.broadinstitute.org/gsea/>) with MCL tumors with or without mutations in *WHSC1* or *NOTCH2* genes.

**TLR stimulation assay.** TLR stimulation assays were performed using tumor cells from two patients, MCL patient M021 and a chronic lymphocytic leukemia (CLL) previously published (3) with the *TLR2* mutation p.D327V, one MCL patient with the p.Y298S mutation, four MCL and three CLL patients with wild type *TLR2*, and purified B-lymphocytes from four healthy donors. Samples were cultured in X-Vivo™ 15 medium (Lonza) supplemented with 10% human AB serum (Sigma GmbH) for 48 hours with several TLR2 agonists (Invivogen) following concentrations suggested by the manufacturer or IL-1beta as control. Samples were then assessed for response of 25 cytokines (IL-1β, IL-1RA, IL-2, IL-2R, IL-4, IL-5, IL-6, IL-7, IL-10, IL-12 (p40), IL-13, IL-15, IL-17, TNF-α, IFN-α, IFN-γ, GM-CSF, MIG, CXCL8/IL-8, CXCL10/IP-10, CCL2/MCP-1 CCL3/MIP-1α, CCL4/MIP-1β, CCL5/RANTES and CCL11/Eotaxin). Cells were first incubated with 10 μg/mL of polymyxin B (Sigma, P-4932) for 20 min except in LPS-incubated samples. *In vitro* cytokine production was initially assessed in cell culture supernatants using fluorescence-activated cell sorter analysis (Luminex100 System). Cytokine Human 25-plex panel (Invitrogen), a multiplexed sandwich immunoassays based on flow cytometry Luminex technology, was used to measure the 25 cytokines of the kit. Net median fluorescence intensity data of each cytokine was analyzed with Xponent™ (Luminex) software and results were extrapolated from curves defined by a prequantified standard reagent. Secretion of cytokines was referred to the level of basal secretion without stimulus. All samples were analyzed in duplicate.

For differential TLR2 stimulation assay, we tested Pam3CSK4 1 μg/mL (stimulating TLR1 & 2), FSL-1 1 μg/mL (stimulating TLR2 & 6), HKLM 10<sup>8</sup> cells/mL (TLR2), LPS-PG 10 μg/mL (TLR2), LTA-SA 1 μg/mL (TLR2) and PGN-SA 10 μg/mL (TLR2).

**Statistical methods.** The PASW Statistics 18.0 (SPSS inc.) and R packages were employed to correlate clinical and biological variables. The independence between categorical clinical parameters and the MCL subgroups was evaluated using Fisher's exact test and continuous variables were compared by Mann-Whitney test. The Wilcoxon rank sum test was used for the comparison of induction levels of interleukin secretion after *TLR2* stimulation in respect to basal secretion levels. Overall survival was measured from date of DNA sampling to date of death or last follow-up, whereas for the allotransplanted patients it was considered until the date of allotransplant. Patients with only available post-treatment DNA were not considered for the survival analysis. Survival curves were plotted according to the Kaplan and Meier method and compared using the log-rank test. Multivariate analysis was performed with the stepwise proportional hazards model (Cox model) assessing that the covariates used in the model and did not violate the proportional hazard assumption. All statistical tests were two-sided and the level of statistical significance was 0.05.



## SUPPLEMENTARY FIGURES

**Fig. S1 (A)** Total number of somatic mutations and indels per genome in the four MCL cases (six samples) analyzed by WGS. Tier 1 includes all non-synonymous mutations, coding frameshifts and mutations affecting canonical splicing sites, Tier 2 includes synonymous mutations and mutations in UTRs, and Tier 3 includes the rest of mutations. **(B)** Frequency of substitutions in each sample for the six possible classes of mutation. \*The progressed sample M003-PB obtained at progression (3.5 years) showed an increase in the number of mutations. M001, M002: SOX11-positive/*IGHV*-unmutated and M003, M004: SOX11-negative/*IGHV*-mutated.

**A**

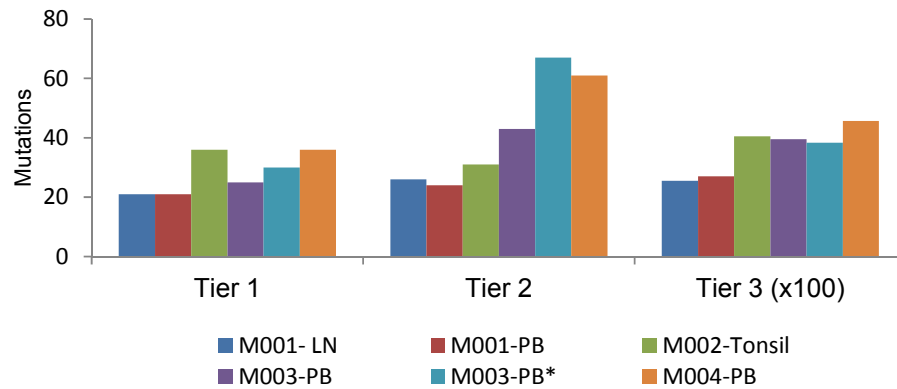

**B**

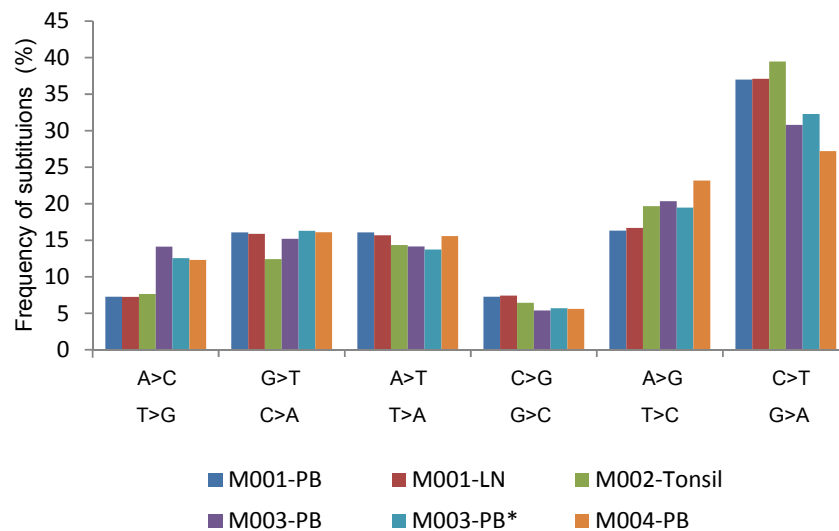

**Fig. S2** (A) Profile of four MCL cases (six samples) analyzed by WGS and -WES. Distribution of somatic alterations (each case is represented in a different color), density of mutations per Mb in a 5 Mb window detected by WGS (vertical bars), protein-coding mutations (triangles) detected by WGS and WES, and copy number alterations (solid lines). The enlarged images show the acquired alterations of chromosomes 4 and 12 in the progressed M003 sample (gains in blue and losses in red). PB: peripheral blood, PB\*: peripheral blood of progressed sample; LN: lymph node. (B) Rainfall plots showing regional clustering of somatic mutations (*kataegis*) in the four cases (six samples) analyzed by WGS. Mutations are represented on the X-axis from chromosome 1 to chromosome Y, and intermutation distance (in  $\log_{10}$  bp) is drawn on the Y-axis. Clusters of mutations present lower intermutation distances (between 0 and 4).

**A**

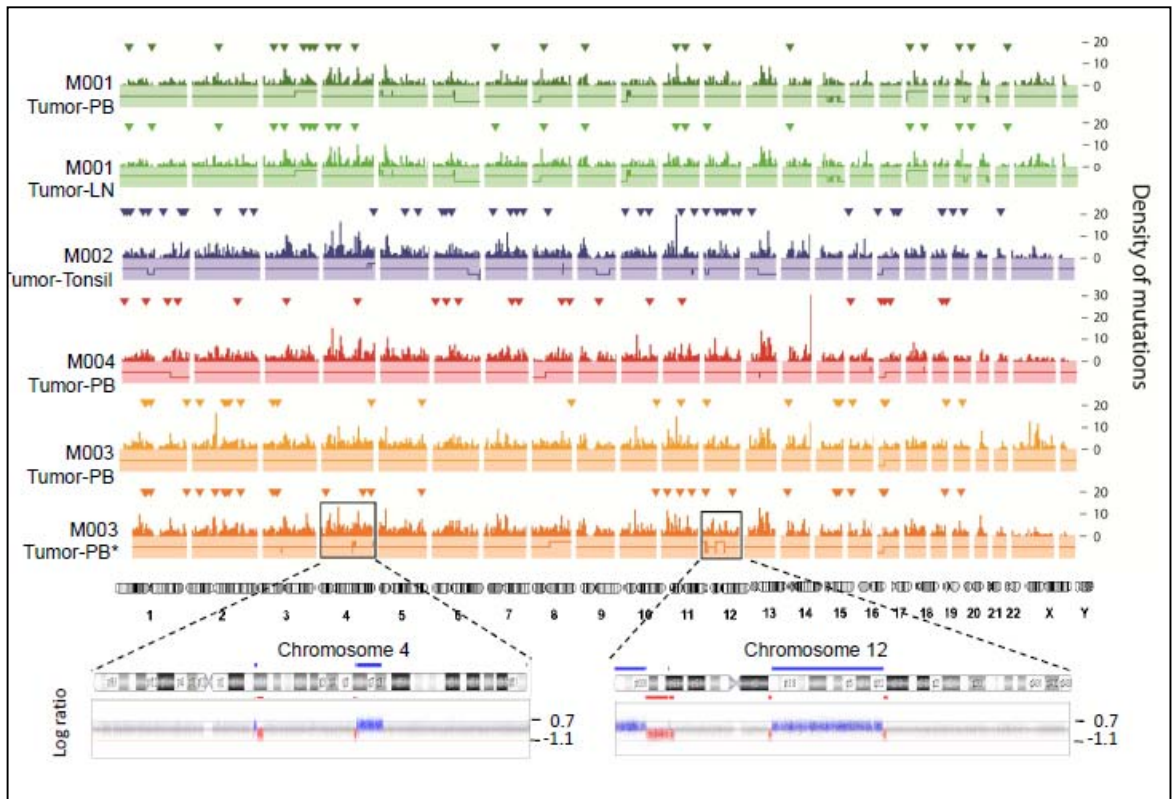

**B**

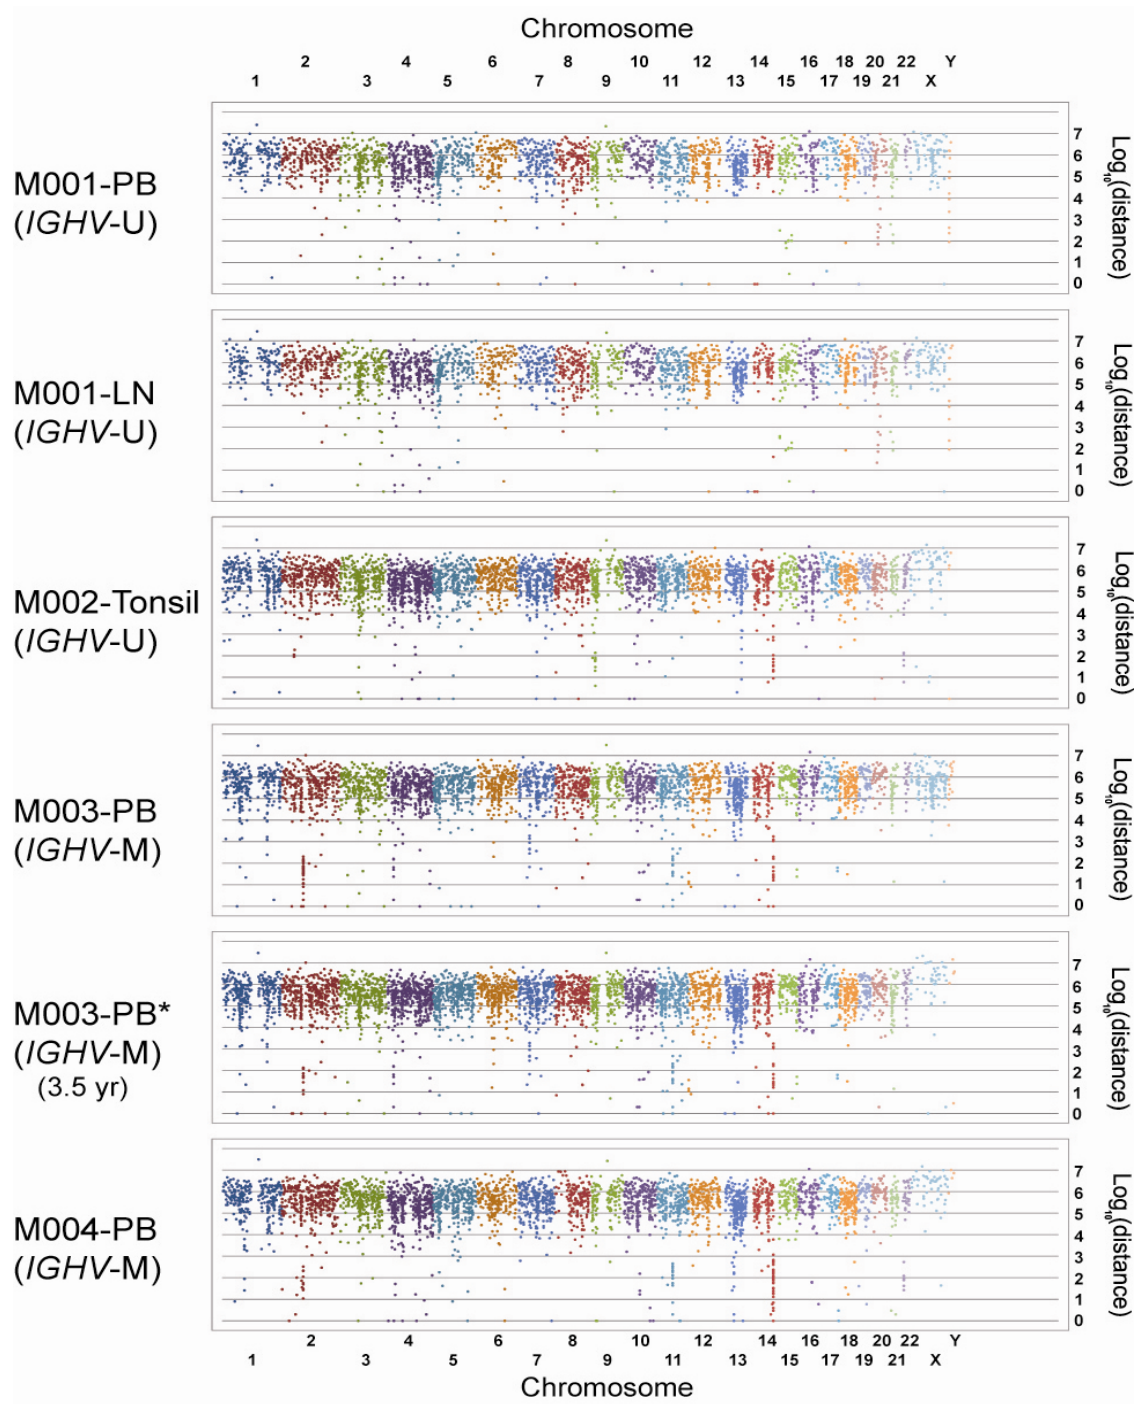

**Fig. S3 (A)** Chromosomal imbalances detected by high-resolution SNP-array in the 29 MCL cases from the WES series. On the X-axis the chromosomes are represented horizontally from 1 to 22, on the Y-axis the percentage of cases showing the CNAs. Gains are represented on the positive Y-axis and colored in blue, whereas losses are represented on the negative Y-axis in red. The most frequent CNA were gains of 3q21.3-q26.31 (9/29, 31%), 8q24.22-q24.3 (7/29, 24%), 12q13.13-q24.33 (4/29, 14%), 13q31 (7/29, 24%) and 18q21.33 (5/29, 17%) and losses of 1p21-p22 (13/29, 45%), 6q23.1-q24.2 (5/29, 17%), 9p21.3 (5/29, 17%, homozygous in 3 cases, zoomed in panel B), 9q21.31-q31.1 (5/29, 17%), 11q22-q23 (11/29, 38%), 13q (14/29, 48%) and 17p13.1 (6/29, 21%) (Table S10). Other homozygous deletions include 6q27, 13q14.2 and 13q32.1-q32.2 in single cases. In addition to copy number changes, 13 regions of acquired CNN-LOH were identified in 11 different patients (Table S10). Integration of CNA and somatic mutations revealed that only the recurrent losses/CNN-LOH of 17p and 11q were associated with mutations of *TP53* (five mutated cases with deletion and one with CNN-LOH), *ATM* (six mutated cases with deletion) and *BIRC3* (nine mutated cases with deletion). *CDKN2A* was the only gene targeted by recurrent homozygous deletions.

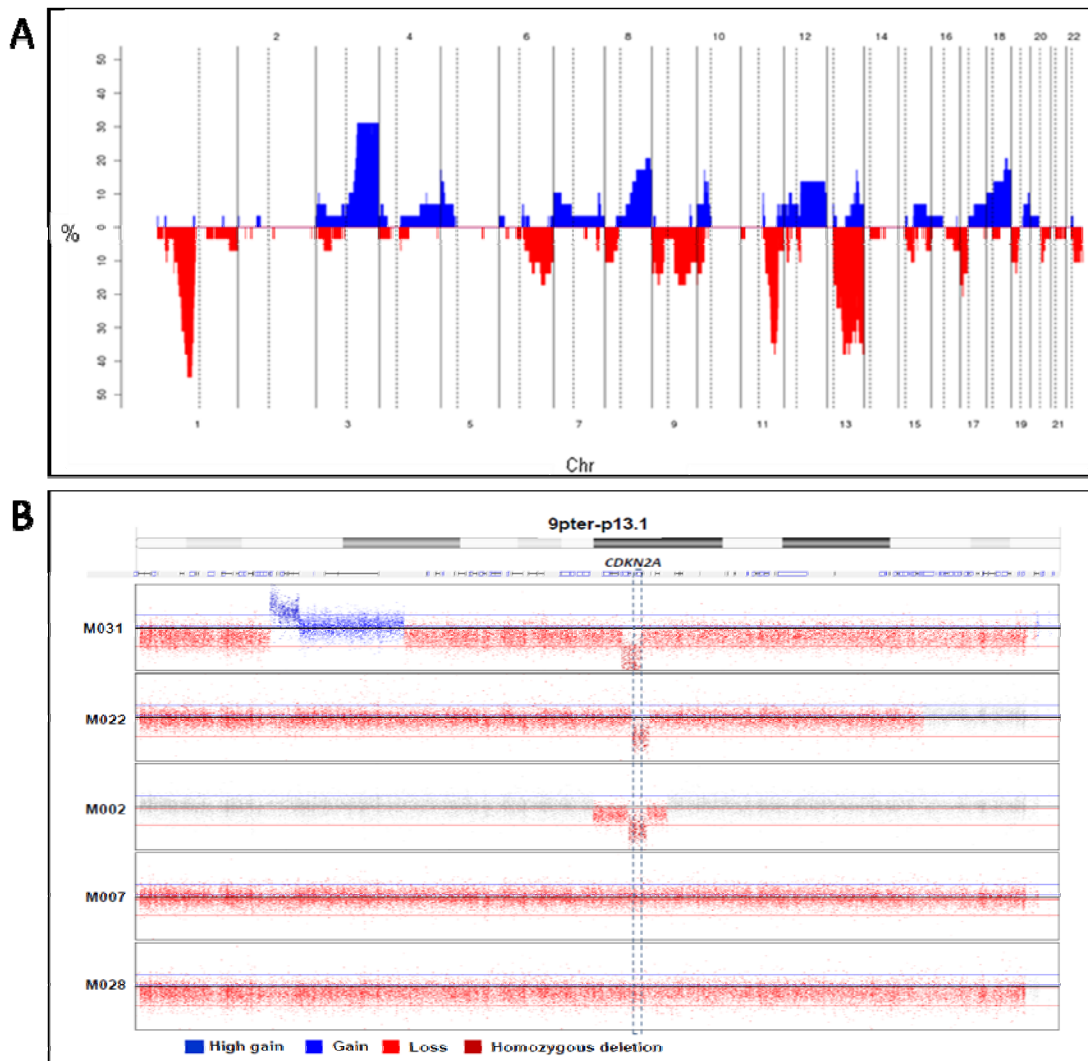

**Fig. S4 (A)** *BIRC3* and *ATM* mutations related to 11q copy number status by SNP-array in the 29 MCL analyzed by WES.

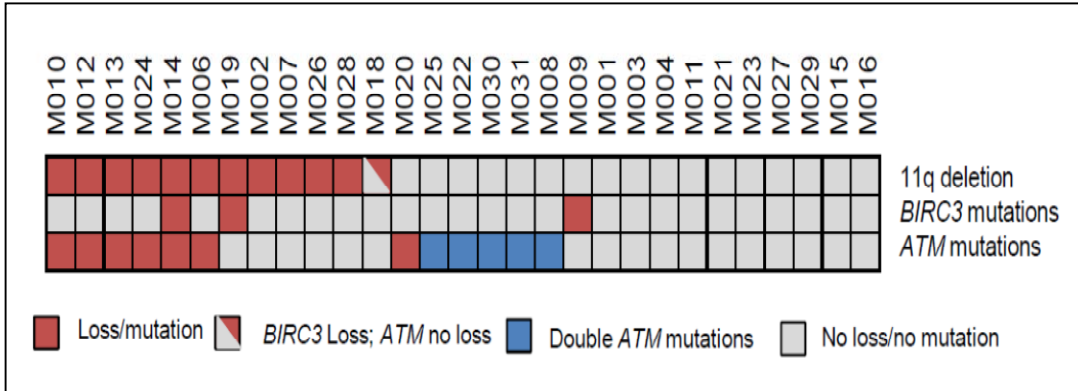

**Fig. S5** *ATM* gene mutation distribution detected by WES in MCL of the present study (upper part) and MCL (10, 11) and CLL (4, 12-19) previously described (lower part).

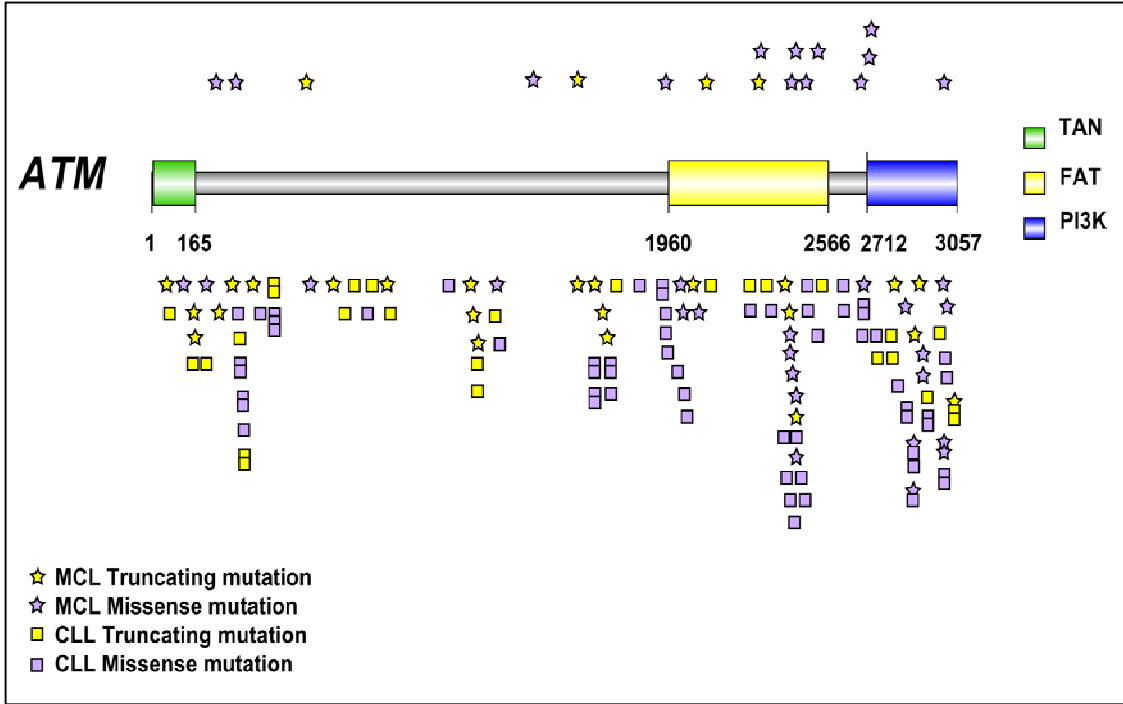

**Fig. S6** *CCND1* gene mutation distribution detected by WES in MCL of the present study (upper part) and in MCL by RNA-sequencing previously described (20) (lower part).

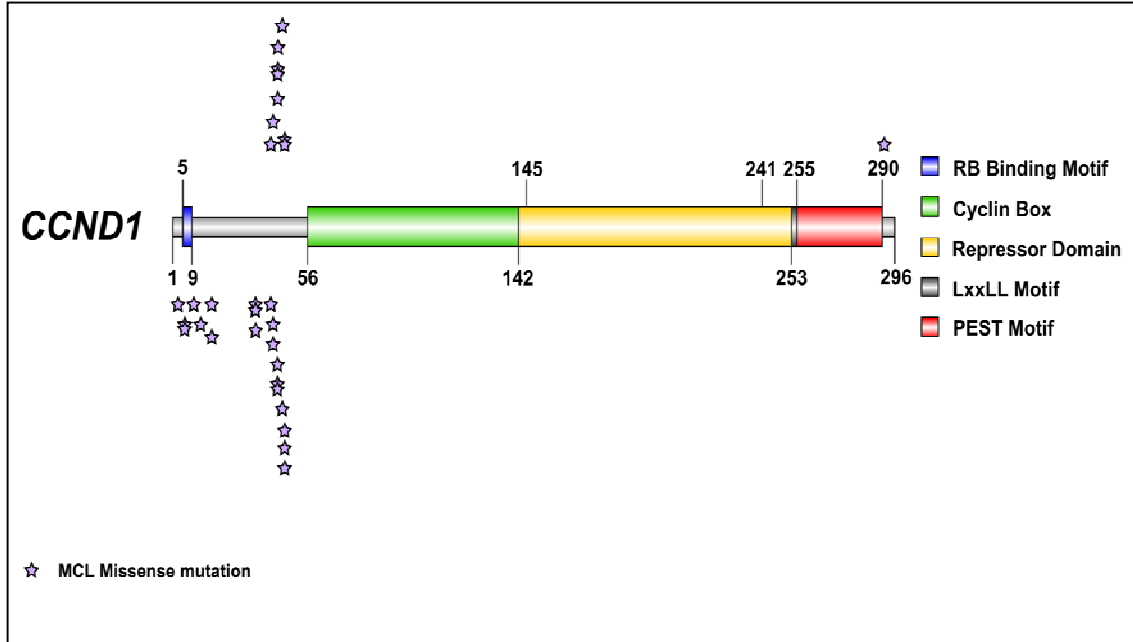

**Fig. S7** Landscape of genetic variation in MCL. Heatmap of the recurrent mutations in MCL (cases in columns) detected by WES and Sanger sequencing in MCL. Only samples with 3 or more evaluable genes are presented. Molecular data include SOX11 expression (positive: green) and *IGHV* gene mutational status (unmutated: blue). The seven validated genes (mutated cases in orange) and recurrent CNA are shown, including 3q and 8q gains (red) and 9p, 11q losses and 17p loss and/or CNN-LOH (blue). Not available information is indicated in white.

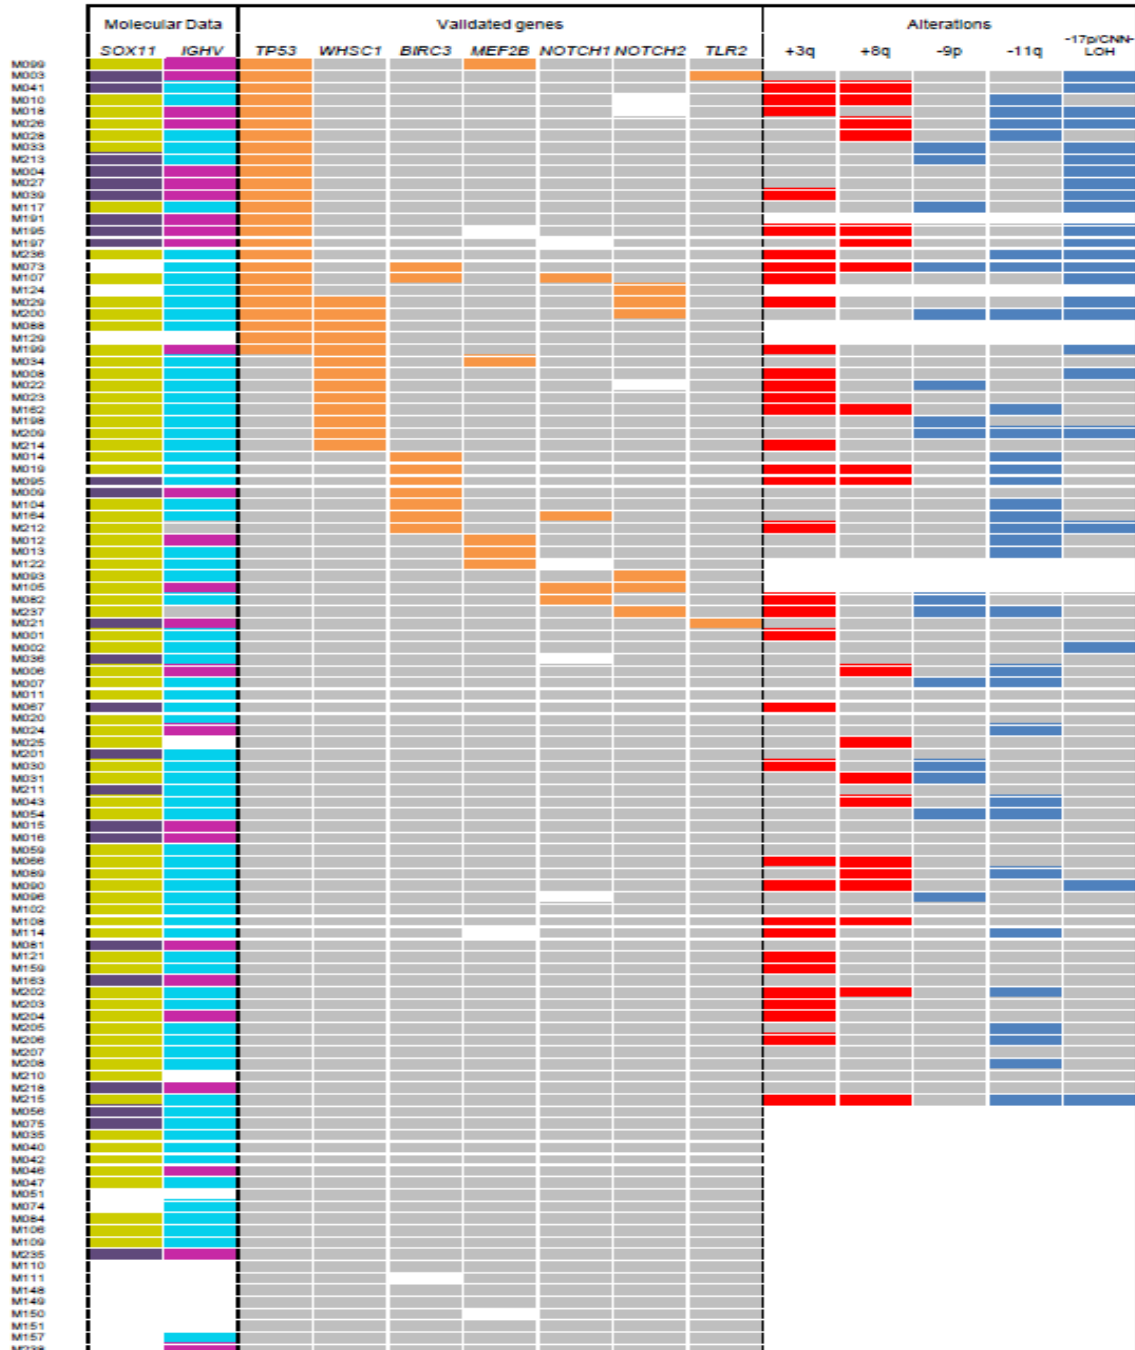



**Fig. S8** Gene set enrichment analysis of 8 *WHSC1*-mutated and 31 -unmutated MCL cases using lymphoid gene expression signatures (21). *WHSC1*-mutated cases showed enrichment of gene signatures related to proliferation (Gene Set 1) (22), cell cycle (Gene Set 2) (23) and the t(4;14)-related signature (MS-cluster) (Gene Set 3) (24). In addition, *WHSC1*-mutated MCL showed significant overexpression of gene signatures associated with the *in vitro* overexpression of wild-type *WHSC1* in the KMS11 PCM cell line described in the supplementary Table S5 of the original paper (Gene Set 4) (25). The remaining two gene sets (Gene Set 5-6) were compiled from the reanalysis of the published gene expression profiling studies of the KMS11 PCM cell line transduced with the wild-type (Gene Set 5) or the gain-of-function exon 19-mutant *WHSC1* (Gene Set 6) (25). Interestingly, these two signatures were also significantly upregulated in the primary MCL with *WHSC1* mutations.

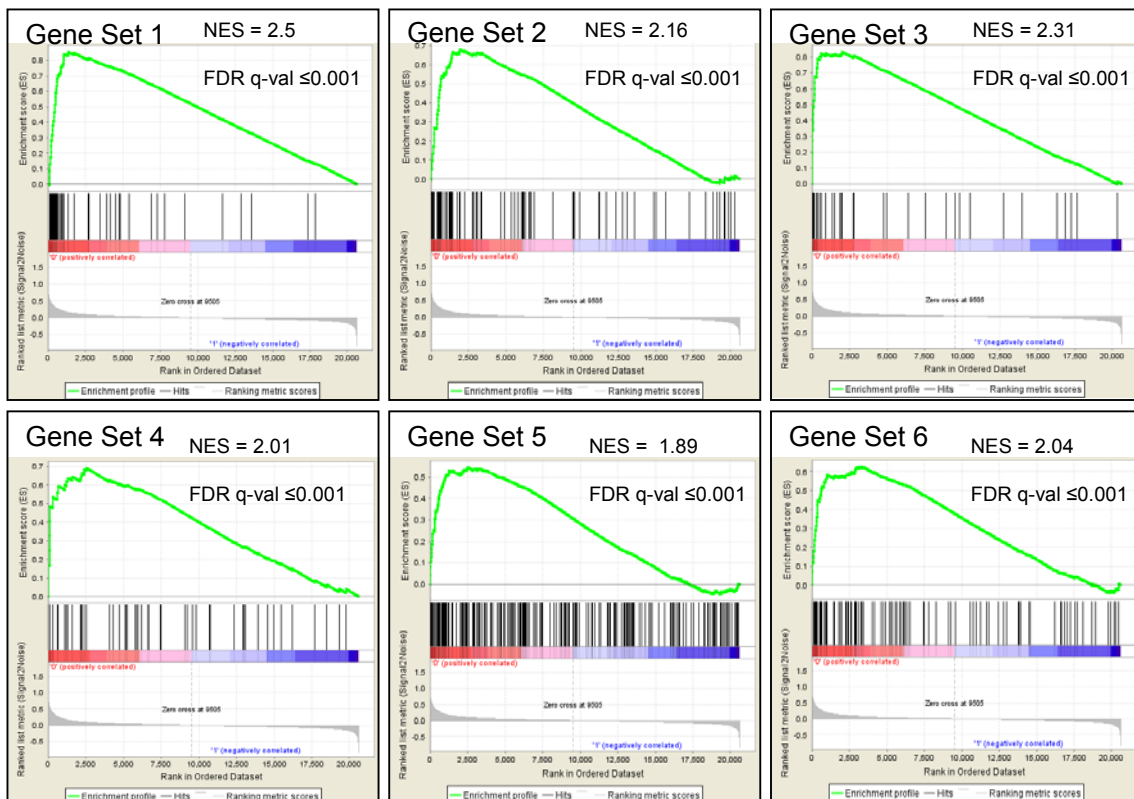

**Fig. S9** *MLL2* gene mutation distribution detected by WES in MCL of the present study (upper part). In the lower part the previously described mutations in diffuse large B-cell lymphoma (DLBCL), follicular lymphoma (FL), and plasma cell myeloma (PCM) (26-29).

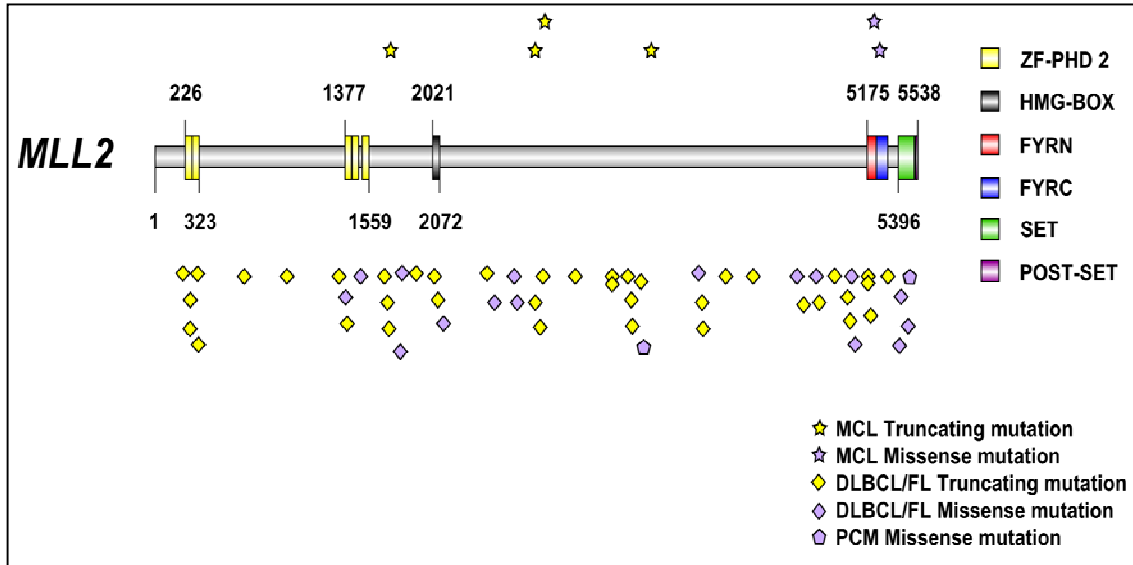

**Fig. S10** *MEF2B* gene mutation distribution showing the location of the different somatic mutations identified by WES and Sanger sequencing in MCL in the present study (upper part) and in DLBCL/FL from the literature (lower part) (26, 27, 30, 31).

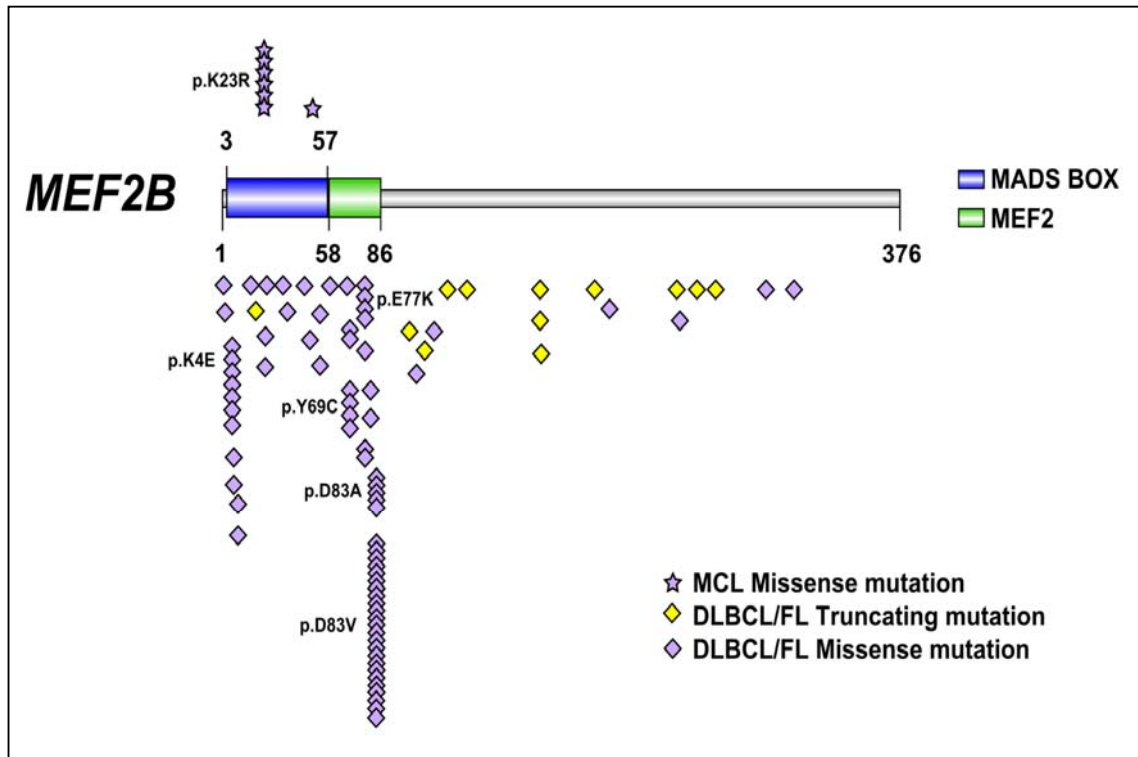

**Fig. S11** Secretion of IL-8 (CXCL8) in *TLR2*-mutated and -unmutated tumors and healthy donors. Plot representing cytokine levels secreted by B cells before and after *TLR2* stimulation with peptidoglycan (PGN) from *S. aureus* (PGN-SA). ‘p.D327V’ corresponds to tumor cells from one MCL and one CLL carrying this mutation. ‘p.Y298S’ corresponds to a MCL patient with this *TLR2* mutation. The values for 3 CLL cases, 4 MCL, and 4 normal B cells are represented as the mean value. Standard error is indicated in bars.

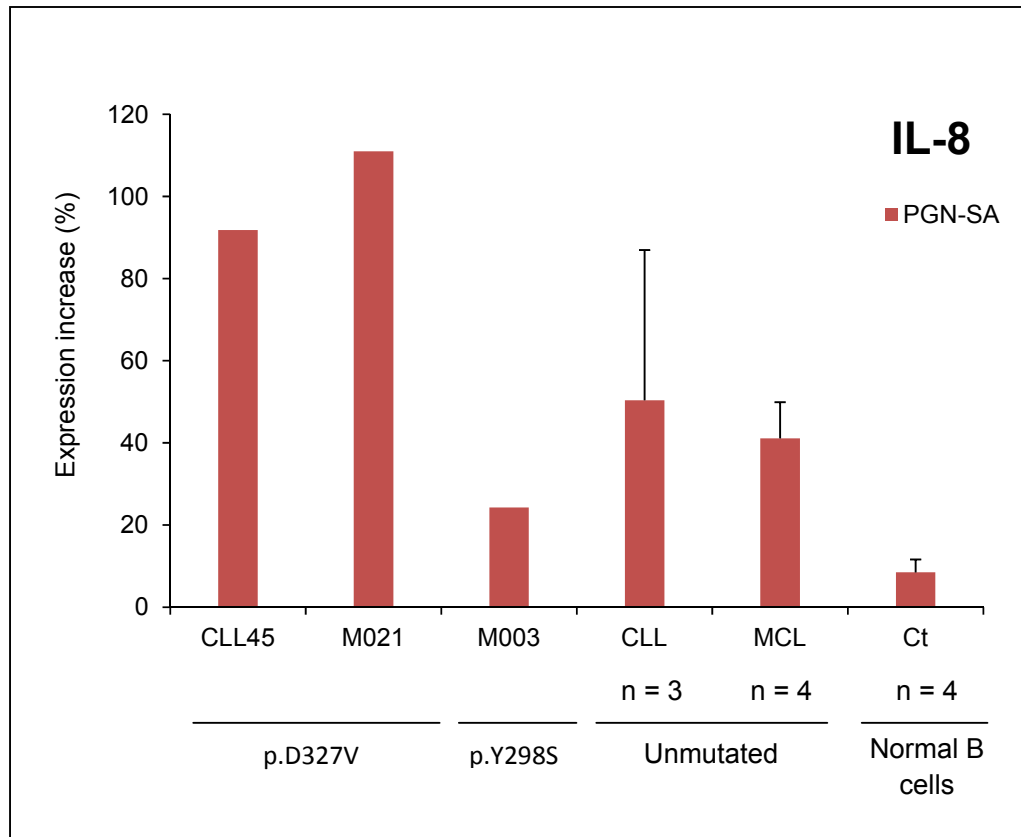

**Fig. S12** Gene set enrichment analysis of 2 *NOTCH2*-mutated and 19 -unmutated cases. The plots show that *NOTCH2*-mutated samples displayed a significant overexpression of three sets of genes upregulated by NOTCH activation in lymphoid cells: Gene Set 1 (32), Gene Set 2 (33), Gene Set 3 (34). *NOTCH2*-mutated tumors also show underexpression of a gene signature upregulated following NOTCH inhibition (Gene Set 4) (35). Similarly, two gene sets up (Gene set 5) and downregulated (Gene Set 6) by NOTCH-inhibition in MCL cell lines (20) were inversely modulated in the *NOTCH2*-mutated MCL.

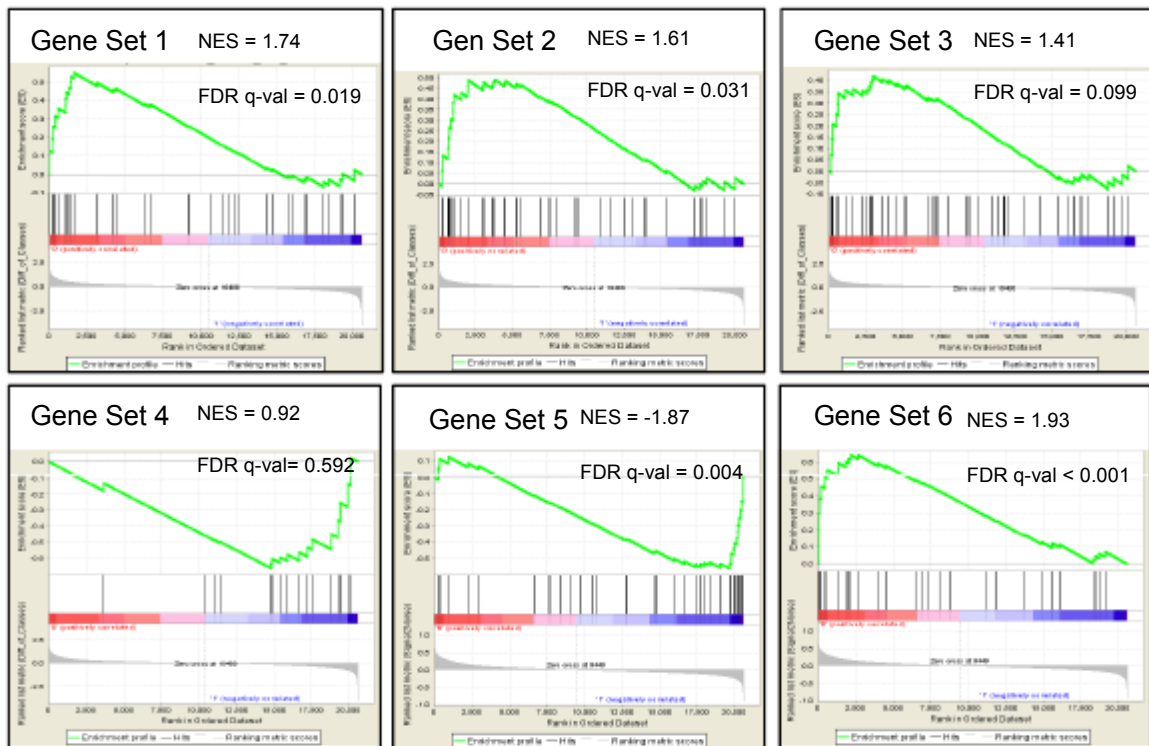

**Fig. S13** Actuarial probability of overall survival of MCL patients according to the combination of both *NOTCH2* and *TP53* mutations. Of note, regardless of *TP53* mutational status patients with *NOTCH2* mutations had a dismal prognosis.

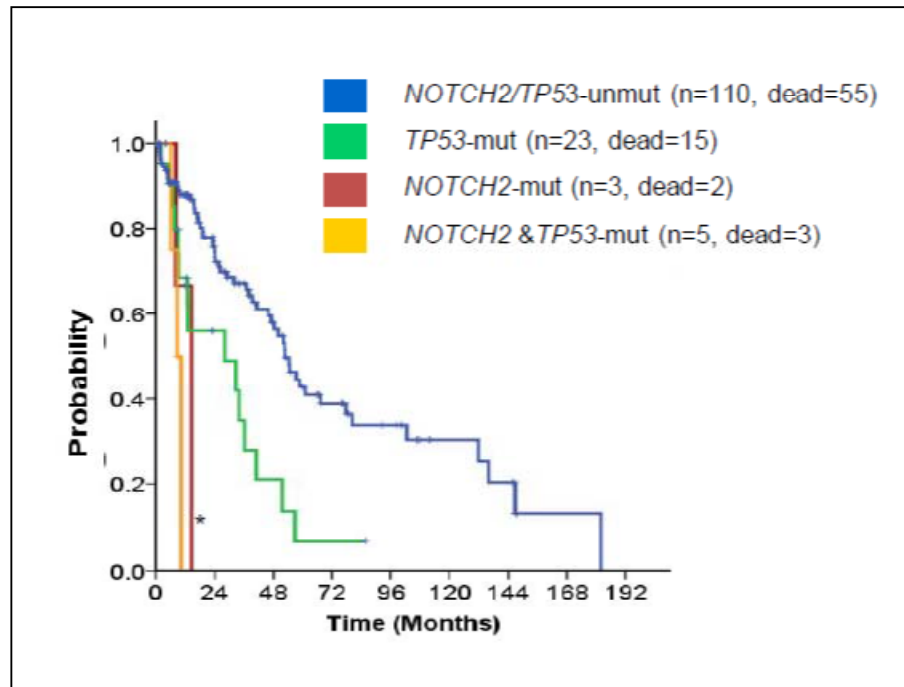

**Fig. S14** *NOTCH1* gene mutation distribution showing the location of the different somatic mutations identified by Sanger sequencing in MCL of the present study (upper part) and in MCL (20), splenic marginal zone lymphoma (36), CLL/Richter Syndrome (3, 37, 38) and DLBCL/FL from the literature (lower part) (26-28).

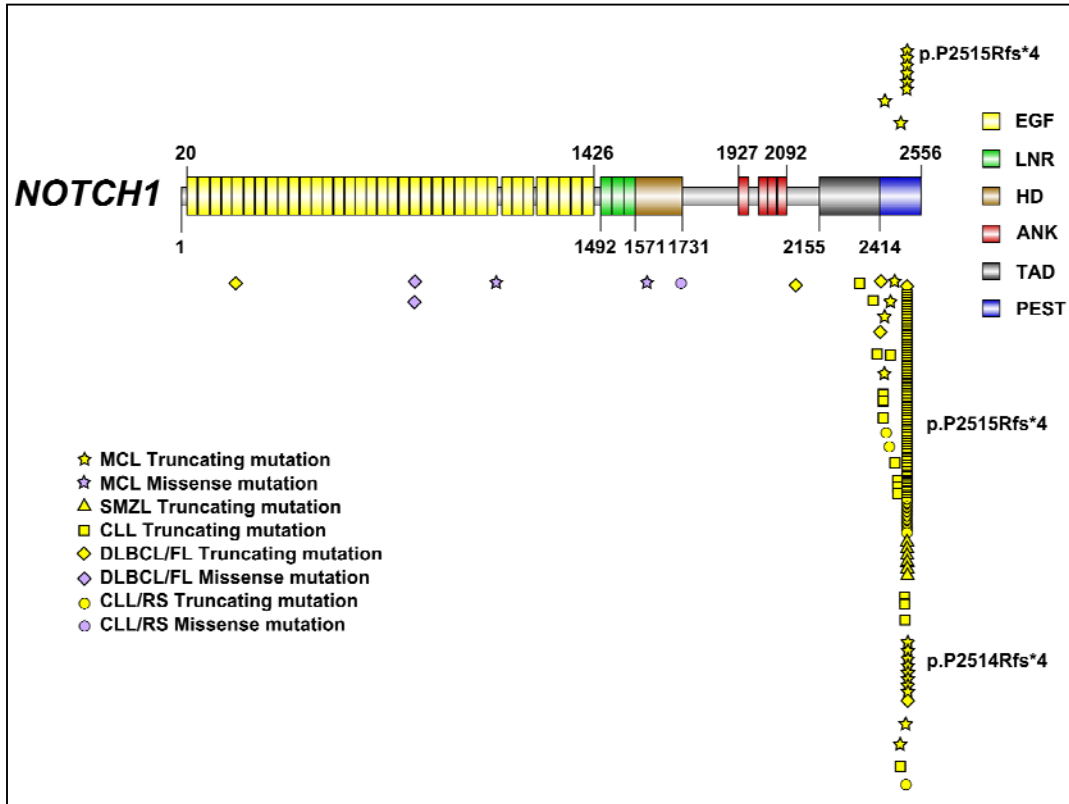

**Fig. S15** Actuarial probability of overall survival of MCL patients with mutated or unmutated *NOTCH1* ( $P=0.026$ ).

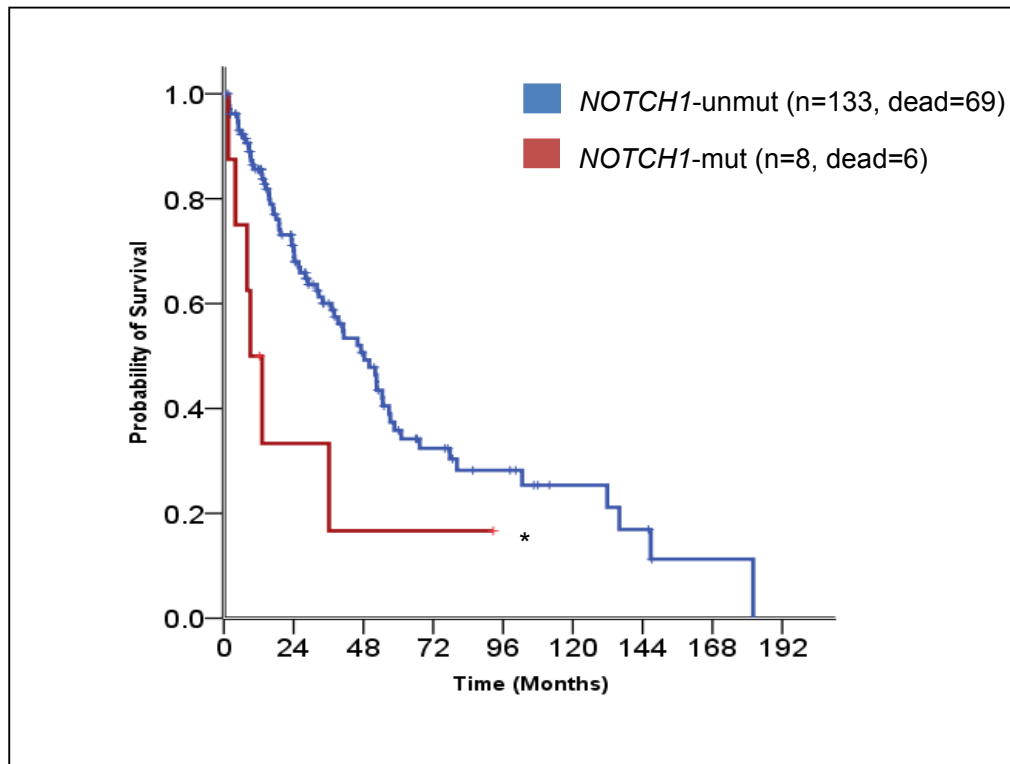



**Fig. S16** Mutational analysis in progressed and synchronic samples of the validation series. The mutated genes are highlighted in red whereas the unmutated genes are grey-colored, white indicates not available. (A) Analysis of mutations of 7 genes in 11 MCL cases with samples at two time points. Sample with asterisk (\*) indicates the progressed/post-treatment sample, the interval of time between samples is indicated in months. (B) Analysis of mutations of 7 genes in 8 MCL cases with synchronic tumor samples affecting different topographic sites. (LN, lymph node; peripheral blood). *BIRC3* mutation was acquired in the relapsed sample of two patients (M009 and M164). Only sample M009-PB\* was used for WES analysis, all the remaining samples correspond to the validation series.

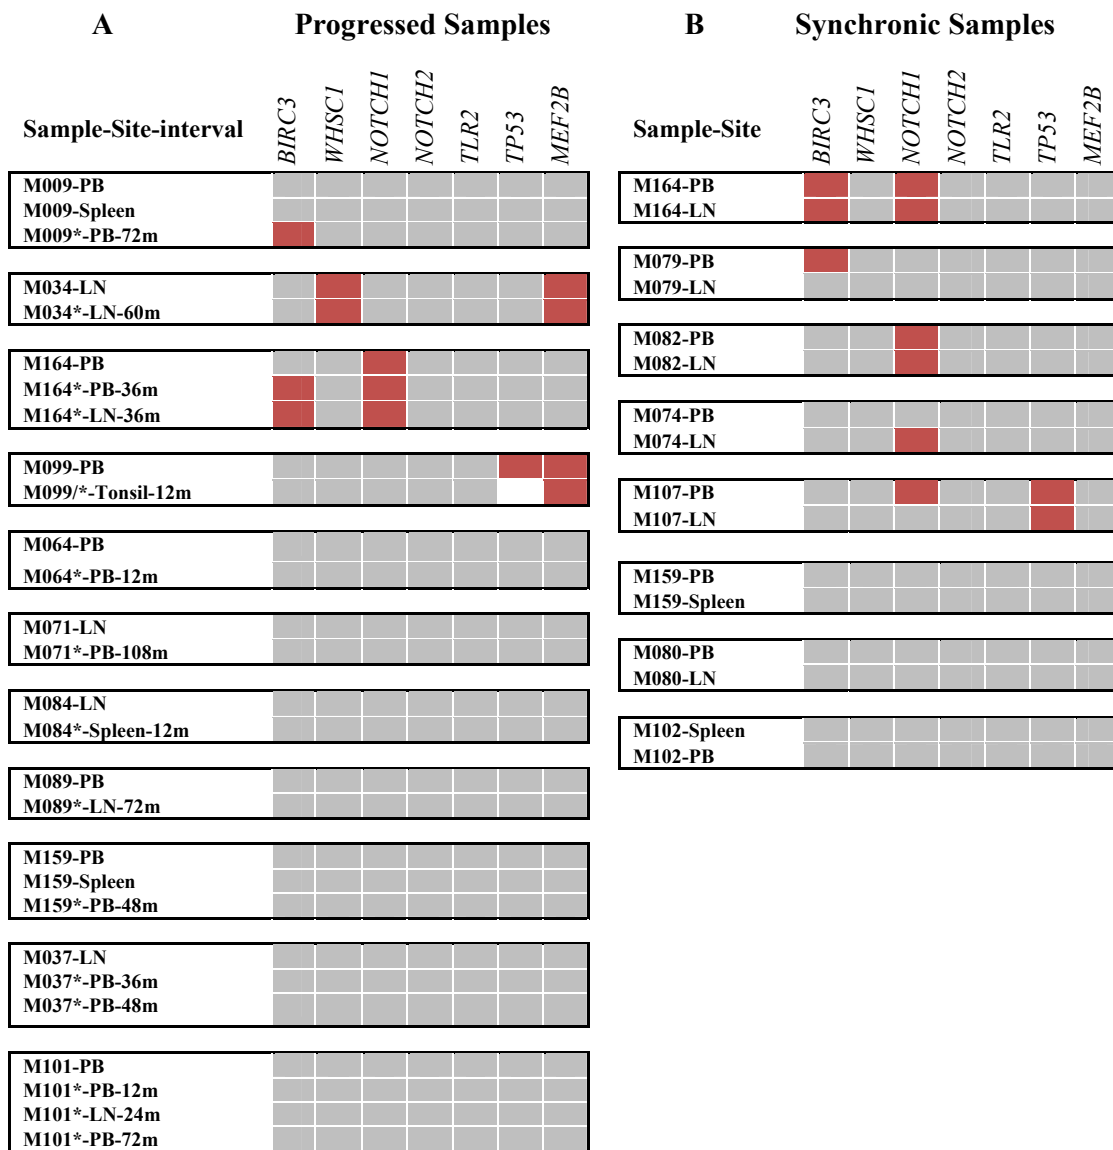

## SUPPLEMENTARY TABLES

**Table S1.** Details of the 29 MCL patients analyzed by WGS and/or WES.

| Case        | Sample       | Sampling Time  | Synchronic/<br>At progression | Cytology    | Purity | WGS | WES | SNP-<br>array | GEP | SOX11 | <i>IGHV</i><br>gene | % <i>IGHV</i> |
|-------------|--------------|----------------|-------------------------------|-------------|--------|-----|-----|---------------|-----|-------|---------------------|---------------|
| <b>M001</b> | PB normal    |                |                               |             | 96     | y   | y   | y             |     |       |                     |               |
| <b>M001</b> | LN tumor     | At diagnosis   | Synchronic                    | Classic     | >90    | y   | y   | y             |     | Pos   | <i>IGHV3-21</i>     | 98.8          |
| <b>M001</b> | PB tumor     | At diagnosis   | Synchronic                    |             | 96.1   | y   | y   | y             | y   | Pos   |                     |               |
| <b>M002</b> | PB normal    |                |                               |             | 99     | y   | y   | y             |     |       |                     |               |
| <b>M002</b> | Tonsil tumor | At diagnosis   |                               | Blastoid    | >90    | y   | y   | y             | y   | Pos   | <i>IGHV4-34</i>     | 99.55         |
| <b>M002</b> | PB tumor     | Post-treatment | Relapse (3.2 yr)              |             | 96     |     | y   | y             |     | Pos   |                     |               |
| <b>M003</b> | PB normal    |                |                               |             | 100    | y   | y   | y             |     |       |                     |               |
| <b>M003</b> | PB tumor     | At diagnosis   |                               | Small cell  | 96     | y   | y   | y             | y   | Neg   | <i>IGHV3-23</i>     | 93.72         |
| <b>M003</b> | PB tumor     | Pre-treatment  | Progression (3.5 yr)          | Pleomorphic | 98     | y   | y   | y             |     | Neg   |                     |               |
| <b>M004</b> | PB normal    |                |                               |             | 99.5   | y   | y   | y             |     |       |                     |               |
| <b>M004</b> | PB tumor     | At diagnosis   |                               | Classic     | 99.7   | y   | y   | y             |     | Neg   | <i>IGHV1-8</i>      | 96.99         |
| <b>M006</b> | PB normal    |                |                               |             | 99.5   | y   | y   | y             |     |       |                     |               |
| <b>M006</b> | PB tumor     | At diagnosis   |                               | Classic     | 95     | y   | y   | y             | y   | Pos   | <i>IGHV4-31</i>     | 96.9          |
| <b>M007</b> | PB normal    |                |                               |             | 99.7   |     | y   | y             |     |       |                     |               |
| <b>M007</b> | Colon tumor  | At diagnosis   |                               | Classic     | >90    |     | y   | y             |     | Pos   | <i>IGHV4-34</i>     | 99.65         |
| <b>M008</b> | PB normal    |                |                               |             | 99     |     | y   | y             |     |       |                     |               |
| <b>M008</b> | PB tumor     | Pre-treatment  |                               | Classic     | 90     |     | y   | y             | y   | Pos   | <i>IGHV1-8</i>      | 99.31         |
| <b>M009</b> | PB normal    |                |                               |             | 99.9   |     | y   | y             |     |       |                     |               |
| <b>M009</b> | PB tumor     | At diagnosis   |                               |             | 99     |     |     | y             |     | Neg   | <i>IGHV3-9</i>      | 92.36         |
| <b>M009</b> | PB tumor     | Post-treatment | Progression (5 yr)            | Small cell  | 98     |     | y   | y             | y   | Neg   |                     |               |
| <b>M010</b> | PB normal    |                |                               |             | 98     |     | y   | y             |     |       |                     |               |
| <b>M010</b> | LN tumor     | At diagnosis   | Synchronic                    | Classic     | >90    |     | y   | y             |     | Pos   | <i>IGHV1-8</i>      | 100           |
| <b>M010</b> | PB tumor     | At diagnosis   | Synchronic                    |             | 100    |     | y   | y             | y   | Pos   |                     |               |
| <b>M011</b> | PB normal    |                |                               |             | 99     |     | y   | y             |     |       |                     |               |
| <b>M011</b> | LN tumor     | At diagnosis   |                               | Classic     | >90    |     | y   | y             |     | Pos   | <i>IGHV1-8</i>      | 98.83         |
| <b>M012</b> | PB normal    |                |                               |             | 100    |     | y   | y             |     |       |                     |               |
| <b>M012</b> | LN tumor     | At diagnosis   |                               | Classic     | 82     |     | y   | y             | y   | Pos   | <i>IGHV3-7</i>      | 96.18         |
| <b>M013</b> | PB normal    |                |                               |             | 99.8   |     | y   | y             |     |       |                     |               |
| <b>M013</b> | LN tumor     | At diagnosis   |                               | Classic     | 75     |     | y   | y             | y   | Pos   | <i>IGHV3-23</i>     | 99.31         |
| <b>M014</b> | PB normal    |                |                               |             | 100    |     | y   | y             |     |       |                     |               |
| <b>M014</b> | LN tumor     | At diagnosis   |                               | Classic     | 89     |     | y   | y             | y   | Pos   | <i>IGHV4-59</i>     | 100           |

|             |              |                |             |            |       |  |   |   |   |     |                 |       |
|-------------|--------------|----------------|-------------|------------|-------|--|---|---|---|-----|-----------------|-------|
| <b>M015</b> | PB normal    |                |             |            | 99.33 |  | y | y |   |     |                 |       |
| <b>M015</b> | PB tumor     | Untreated      |             | Small cell | 85.2  |  | y | y | y | Neg | <i>IGHV1-2</i>  | 96.53 |
| <b>M016</b> | PB normal    |                |             |            | 95.5  |  | y | y |   |     |                 |       |
| <b>M016</b> | Spleen Tumor | Untreated      | Synchronous | Small cell | 89    |  | y | y |   | Neg | <i>IGHV4-39</i> | 92.04 |
| <b>M016</b> | PB tumor     | Pre-treatment  | Synchronous |            | 97.2  |  | y | y | y | Neg |                 |       |
| <b>M018</b> | PB normal    |                |             |            | 99.5  |  | y | y |   |     |                 |       |
| <b>M018</b> | PB tumor     | Post-treatment |             | Classic    | 99.5  |  | y | y |   | Pos | <i>IGHV3-23</i> | 93.75 |
| <b>M019</b> | PB normal    |                |             |            | 97.5  |  | y | y |   |     |                 |       |
| <b>M019</b> | PB tumor     | At diagnosis   |             | Blastoid   | 99    |  | y | y |   | Pos | <i>IGHV1-18</i> | 99.25 |
| <b>M020</b> | PB normal    |                |             |            | 99    |  | y | y |   |     |                 |       |
| <b>M020</b> | PB tumor     | At diagnosis   |             | Classic    | 84    |  | y | y |   | Pos | <i>IGHV3-21</i> | 97.41 |
| <b>M021</b> | PB normal    |                |             |            | 99.5  |  | y | y |   |     |                 |       |
| <b>M021</b> | PB tumor     | Untreated      |             | Small cell | 99    |  | y | y | y | Neg | <i>IGHV1-8</i>  | 94.44 |
| <b>M022</b> | PB normal    |                |             |            | 100   |  | y | y |   |     |                 |       |
| <b>M022</b> | LN tumor     | Post-treatment |             | Blastoid   | >90   |  | y | y | y | Pos | <i>IGHV1-8</i>  | 100   |
| <b>M023</b> | PB normal    |                |             |            | 97.6  |  | y | y |   |     |                 |       |
| <b>M023</b> | LN tumor     | At diagnosis   | Synchronous | Classic    | >90   |  | y | y | y | Pos | <i>IGHV3-21</i> | 99.59 |
| <b>M023</b> | PB tumor     | At diagnosis   | Synchronous |            | 96.9  |  | y | y |   | Pos |                 |       |
| <b>M024</b> | PB normal    |                |             |            | 98    |  | y | y |   |     |                 |       |
| <b>M024</b> | LN tumor     | At diagnosis   |             | Blastoid   | 80    |  | y | y | y | Pos | <i>IGHV4-4</i>  | 95.24 |
| <b>M025</b> | PB normal    |                |             |            | 99    |  | y | y |   |     |                 |       |
| <b>M025</b> | LN tumor     | Untreated      |             | Classic    | 65    |  | y | y | y | Pos | n.a.            | n.a.  |
| <b>M026</b> | PB normal    |                |             |            | 99.9  |  | y | y |   |     |                 |       |
| <b>M026</b> | LN tumor     | At diagnosis   | Synchronous | Classic    | 50    |  | y | y |   | Pos | <i>IGHV4-59</i> | 95.09 |
| <b>M026</b> | PB tumor     | At diagnosis   | Synchronous |            | 99.5  |  | y | y | y | Pos |                 |       |
| <b>M027</b> | PB normal    |                |             |            | 98.4  |  | y | y |   |     |                 |       |
| <b>M027</b> | PB tumor     | Untreated      |             | Small cell | 98.9  |  | y | y | y | Neg | <i>IGHV1-8</i>  | 96.88 |
| <b>M028</b> | PB normal    |                |             |            | 99.5  |  | y | y |   |     |                 |       |
| <b>M028</b> | PB tumor     | At diagnosis   |             | Classic    | 87    |  | y | y | y | Pos | <i>IGHV3-23</i> | 100   |
| <b>M029</b> | PB normal    |                |             |            | 99.3  |  | y | y |   |     |                 |       |
| <b>M029</b> | PB tumor     | At diagnosis   |             | Blastoid   | 99.3  |  | y | y | y | Pos | <i>IGHV4-59</i> | 98.25 |
| <b>M030</b> | PB normal    |                |             |            | 99.4  |  | y | y |   |     |                 |       |
| <b>M030</b> | PB tumor     | At diagnosis   |             | Classic    | 99.7  |  | y | y | y | Pos | <i>IGHV3-11</i> | 98.26 |
| <b>M031</b> | PB normal    |                |             |            | 100   |  | y | y |   |     |                 |       |
| <b>M031</b> | LN tumor     | At diagnosis   | Synchronous | Blastoid   | 98    |  | y | y |   | Pos | <i>IGHV3-9</i>  | 100   |
| <b>M031</b> | PB tumor     | At diagnosis   | Synchronous |            | 95    |  | y | y |   | Pos |                 |       |

Abbreviations: IGHV, immunoglobulin heavy chain gene; GEP, gene expression profile; LN, lymph node; Neg.: negative; n.a., not available; PB, peripheral blood; Pos., positive; WGS, whole genome sequencing; Y, yes; yr, years.

**Table S2.** Clinicobiological features of the 4 patients (6 samples) analyzed by WGS.

|                                                     | <b>M001*</b>    | <b>M002</b>     | <b>M003</b>     | <b>M003†</b>      | <b>M004</b>    |
|-----------------------------------------------------|-----------------|-----------------|-----------------|-------------------|----------------|
| <b>DEMOGRAPHICS</b>                                 |                 |                 |                 |                   |                |
| <b>Age (years)</b>                                  | 63              | 79              | 75              | 79                | 81             |
| <b>Gender</b>                                       | Male            | Male            | Male            | Male              | Male           |
| <b>MOLECULAR AND PATHOLOGICAL DATA</b>              |                 |                 |                 |                   |                |
| <b>Cytological variant</b>                          | Classic         | Blastoid        | Small cell      | Pleomorphic       | Classic        |
| <b>CD5</b>                                          | Positive        | Positive        | Negative        | Negative          | Positive       |
| <b>CD23</b>                                         | Negative        | Negative        | Negative        | Negative          | Low positive   |
| <b>Ki-67 (%)</b>                                    | 50              | 85              | NA              | NA                | NA             |
| <b>SOX11</b>                                        | Positive        | Positive        | Negative        | Negative          | Negative       |
| <b>IGHV gene</b>                                    | <i>IGHV3-21</i> | <i>IGHV4-34</i> | <i>IGHV3-23</i> | <i>IGHV3-23</i>   | <i>IGHV1-8</i> |
| <b>% IGHV identity</b>                              | 98.8            | 99.55           | 93.72           | 93.72             | 96.99          |
| <b>Number of CNA</b>                                | 23              | 11              | 1               | 22                | 6              |
| <b>Sample analyzed</b>                              | LN/PB*          | Tonsil          | PB              | PB                | PB             |
| <b>DNA at diagnosis</b>                             | Yes             | Yes             | Yes             | No<br>(3.5 years) | Yes            |
| <b>CLINICAL FEATURES AND OUTCOME</b>                |                 |                 |                 |                   |                |
| <b>ECOG (<math>\geq 2</math>)</b>                   | Yes             | No              | No              | Yes               | No             |
| <b>B-symptoms</b>                                   | No              | Yes             | No              | No                | No             |
| <b>Ann Arbor Stage</b>                              | IV              | I               | IV              | IV                | IV             |
| <b>Lymph nodes (&gt;1cm)</b>                        | Yes             | No              | No              | No                | No             |
| <b>Palpable splenomegaly</b>                        | Yes             | No              | No              | No                | No             |
| <b>Bone marrow involvement</b>                      | Yes             | No              | Yes             | Yes               | Yes            |
| <b>Lymphocytes (<math>\times 10^9</math>)</b>       | 36              | 1.5             | 9               | 18.5              | 40             |
| <b>Leukocytes (<math>\times 10^9</math>)</b>        | 38.7            | 8.3             | 13.3            | 18.9              | 46.8           |
| <b>LDH (&gt;ULN)</b>                                | Yes             | No              | No              | No                | No             |
| <b><math>\beta 2</math>-Microglobulin (&gt;ULN)</b> | Yes             | No              | No              | Yes               | Yes            |
| <b>MIPI Risk</b>                                    | High            | High            | Low             | High              | High           |
| <b>Treatment</b>                                    | R-CHOP          | CHOP            | Untreated       | R-COP             | CLB            |
| <b>Response</b>                                     | Failure         | CR              | -               | CR                | Failure        |
| <b>Status (OS, months) ‡</b>                        | Dead (9)        | Dead (39)       | Alive (86+)     | Alive (47+)       | AWD (23+)      |

Abbreviations: AWD: alive with disease; CHOP , Cyclophosphamide, doxorubicin, vincristine and prednisone; CLB, Chlorambucil; CR, complete response; ECOG, Eastern Cooperative Oncology Group; IPI, International Prognostic Index; LDH, Lactate dehydrogenase; MIPI, Mantle cell lymphoma International Prognostic Index; NA, not applicable; ULN, upper level of normal; WGS, whole genome sequencing.

\*Two synchronic tumor samples from peripheral blood (PB) and lymph node (LN) were sequenced.

†Sample M003 corresponds to the sequential sample of patient M003 obtained 3.5 years after diagnosis at the moment of progression of the patient.

‡OS from sampling.

**Table S3.** Clinicobiological features of the 29 MCL patients analyzed by WES and the 172 patients included in the validation series.

| Variable                               | Category              | WES Series (n=29) | Validation Series (n=172) |
|----------------------------------------|-----------------------|-------------------|---------------------------|
| <b>DEMOGRAPHICS</b>                    |                       |                   |                           |
| Age at diagnosis                       | Median (range)        | 67 (48-89)        | 66 (35-89)                |
| Gender                                 | Male                  | 21                | 133                       |
| <b>MOLECULAR AND PATHOLOGICAL DATA</b> |                       |                   |                           |
| Cytological variant                    | Blastoid/pleomorphic  | 7/29 (24%)        | 23/133 (17%)              |
| CD5                                    | Positive              | 21/28 (72%)       | 92/98 (94%)               |
| CD23                                   | Negative              | 21/28 (75%)       | 51/66 (77%)               |
| Ki-67                                  | High ( $\geq 30\%$ )  | 9/20 (45%)        | 28/89 (31%)               |
| SOX11                                  | Positive              | 22/29 (76%)       | 85/116 (73%)              |
| <i>IGHV</i>                            | Unmutated ( $>97\%$ ) | 16/28 (57%)       | 90/124 (73%)              |
| CNA                                    | Mean (SD)             | 9.93 (9.36)       | 9.32 (9.56)               |
| <b>CLINICAL FEATURES AND OUTCOME</b>   |                       |                   |                           |
| ECOG                                   | $\geq 2$              | 7/23 (30%)        | 25/80 (31%)               |
| B-symptoms                             |                       | 4/23 (17%)        | 29/83 (35%)               |
| Ann Arbor Stage                        | IV                    | 23/29 (79%)       | 89/97 (92%)               |
| Lymph nodes                            | (>1 cm)               | 17/28 (61%)       | 107/143 (75%)             |
| Palpable splenomegaly                  |                       | 10/28 (36%)       | 76/125 (61%)              |
| Bone marrow involvement                |                       | 21/23 (91%)       | 84/90 (93%)               |
| LDH                                    | (>ULN)                | 8/27 (30%)        | 39/93 (41%)               |
| $\beta 2$ -Microglobulin               | (>ULN)                | 19/26 (73%)       | 53/76 (70%)               |
| MIPI Risk                              | High                  | 15/24 (63%)       | 46/69 (67%)               |
| Treatment                              | No treatment          | 5/29 (17%)        | 14/139 (11%)              |
|                                        | Conventional*         | 14/29 (42%)       | 101/139 (73%)             |
|                                        | High dose AraC or HDT | 9/29 (31%)        | 10/139 (7%)               |
|                                        | Rituximab at any time | 19/26 (73%)       | 49/121 (40%)              |
| Response                               | Complete response     | 16/24 (67%)       | 21/80 (26%)               |
|                                        | Partial response      | 5/24 (21%)        | 32/80 (40%)               |
| Follow-up (months)                     | Median (range)        | 12.8 (6-147)      | 43.25 (0.4-195)           |
| Overall survival (months)              | Median (95% CI)       | 77 (15-100)       | 52 (45-58)                |
| Status                                 | Dead                  | 10/29 (34%)       | 100/165 (61%)             |
| Time of sampling                       | At diagnosis          | 20/29 (69%)       | 126/159 (79%)             |
|                                        | Pre-treatment         | 6/29 (21%)        | 11/159 (7%)               |
|                                        | Progression/Relapse   | 3/29 (10%)        | 22/159 (14%)              |
| Sample analyzed (site)†                | PB                    | 22/37 (60%)       | 80/194 (41%)              |
|                                        | LN                    | 12/37 (32%)       | 81/194 (42%)              |
|                                        | Spleen                | 1/37(3%)          | 12/194 (6%)               |
|                                        | Others                | 2/37 (5%)         | 21/194 (11%)              |

Abbreviations: CNA, copy number alterations; CI, confidence interval; F, female; LDH, Lactate dehydrogenase; MIPI, Mantle cell lymphoma International Prognostic Index; SD, standard deviation; ULN, upper level of normal.

\*Conventional treatment included CHOP or CHOP-like regimens in the majority of cases (67%) and in a lesser extent alkylators-only or fludarabine based combinations.

†Samples of patients analyzed at different time points or different topographic sites are considered.

**Table S4.** Characteristics and authentication of the six MCL cell lines analyzed by WES.

|                        | <b>JVM-2</b>   | <b>JEKO-1</b>   | <b>MAVER-1</b> | <b>MINO</b>     | <b>REC-1</b>   | <b>Z138</b>    |
|------------------------|----------------|-----------------|----------------|-----------------|----------------|----------------|
| <b>Gender</b>          | Female         | Female          | Male           | Female          | Male           | Male           |
| <b>CD5</b>             | Positive       | Positive        | Positive       | Positive        | Negative       | Negative       |
| <b>CD23</b>            | Positive       | Negative        | Negative       | Negative        | Negative       | Negative       |
| <b>SOX11</b>           | Negative       | Positive        | Positive       | Positive        | Positive       | Positive       |
| <b>EBV</b>             | Positive       | Negative        | Negative       | Negative        | Negative       | Negative       |
| <b>CNA</b>             | 8              | 79              | 47             | 22              | 37             | 25             |
| <b>Ploidy</b>          | 2n             | 3n+             | 2n             | 3n+             | 2n-            | 2n             |
| <b>MYC</b>             | Wt             | Amp             | Wt             | Wt              | Wt             | Wt             |
| <b>BCL2</b>            | Wt             | Gain            | Amp            | Amp             | Wt             | Amp            |
| <b>CCND1</b>           | Transl.        | Transl.         | Transl./Amp    | Transl.         | Transl.        | Transl.        |
| <b>IGHV gene</b>       | <i>IGHV3-9</i> | <i>IGHV2-70</i> | <i>IGHV3-9</i> | <i>IGHV3-21</i> | <i>IGHV1-2</i> | <i>IGHV1-8</i> |
| <b>% IGHV identity</b> | 100            | 99.66           | 100            | 98.6            | 98.61          | 98.96          |
| <b>D5S818*</b>         | 11-12          | 10-13           | 12-12          | 11-12           | 12-13          | 11-13          |
| <b>D13S317*</b>        | 11-13          | 8-9             | 8-13           | 12-12           | 10-10          | 9-12           |
| <b>D7S820*</b>         | 10-11          | 10-11           | 8-8            | 10-11           | 10-11          | 8-8            |
| <b>D16S539*</b>        | 12-13          | 12-12           | 9-12           | 11-12           | 11-11          | 11-11          |
| <b>VWA*</b>            | 17-17          | 14-14           | 14-18          | 14-17           | 17-17          | 15-18          |
| <b>TH01*</b>           | 6-9            | 7-7             | 8-9            | 9.3- 9.3        | 9- 9.3         | 6-6            |
| <b>AM*</b>             | X-X            | X-X             | X-Y            | X-Y             | X-Y            | X-Y            |
| <b>TPOX*</b>           | 8-11           | 8-8             | 8-12           | 8-11            | 8-9            | 8-8            |
| <b>CSFIPO*</b>         | 11-11          | 9-12            | 10-11          | 9-11            | 10-12          | 10-11          |

Abbreviations: Amp., Amplification; CNA, copy number alterations; EBV, Epstein-Barr virus; Transl., translocation; Wt: wild type (no gain, no loss, no translocation).

\*The cell line identity was authenticated by analyzing 9 alleles with PowerPlex 1.2 kit (Promega) and using an on-line STR profile maintained by **Deutsche Sammlung von Mikroorganismen und Zellkulturen (DSMZ)** (<http://www.dsmz.de/services/services-human-and-animal-cell-lines/online-str-analysis.html>). All cell lines were negative for mycoplasma contamination test. JVM-2, JEKO- 1 and MINO were purchased at ATCC. MAVER-1, REC-1 and Z138 were kindly provided by Dr. A. Zamo (Verona, Italy), Dr. Bastard (Rouen, France) and Dr. E. Ortega-Paino (Sweden), respectively.

**Table S5.** Statistics of the four MCL analyzed by WGS.

| Case        | Sample       | Number of reads mapped | Depth | Callability<br>( $\geq 10$ reads) |
|-------------|--------------|------------------------|-------|-----------------------------------|
| <b>M001</b> | Normal       | 927,200,649            | 25X   | 95.24                             |
|             | Tumor-PB     | 804,035,210            | 29X   | 94.53                             |
|             | Tumor-LN     | 1,512,779,314          | 50X   | 99.43                             |
| <b>M002</b> | Normal       | 1,236,000,961          | 39X   | 99.28                             |
|             | Tumor-Tonsil | 1,682,828,406          | 52X   | 99.3                              |
| <b>M003</b> | Normal       | 1,780,104,841          | 56X   | 99.7                              |
|             | Tumor-PB     | 1,971,489,271          | 69X   | 99.65                             |
|             | Tumor-PB*    | 2,295,624,016          | 59X   | 99.63                             |
| <b>M004</b> | Normal       | 1,631,707,336          | 54X   | 99.64                             |
|             | Tumor-PB     | 1,747,697,204          | 54X   | 99.6                              |

Abbreviations: LN, Lymph node; PB, peripheral blood.

\*Pre-treatment progressed sample of patient M003 after 3.5 years.

**Table S6.** Statistics of the 37 tumor samples, their 29 corresponding normal DNA, and six MCL cell lines analyzed by WES.

| Case        | Sample       | Number of reads mapped | Depth | Callability ( $\geq 10$ reads) |
|-------------|--------------|------------------------|-------|--------------------------------|
| <b>M001</b> | Normal       | 95,779,162             | 80X   | 87.14%                         |
|             | Tumor-PB     | 120,654,496            | 103X  | 88.12%                         |
|             | Tumor-LN     | 95,779,162             | 93X   | 88.73%                         |
| <b>M002</b> | Normal       | 123,225,998            | 109X  | 90.11%                         |
|             | Tumor-Tonsil | 90,828,297             | 81X   | 89.09%                         |
|             | Tumor-PB*    | 82,115,112             | 73X   | 85.28%                         |
| <b>M003</b> | Normal       | 76,169,653             | 67X   | 86.55%                         |
|             | Tumor-PB     | 108,481,777            | 97X   | 89.14%                         |
|             | Tumor-PB*    | 97,100,344             | 87X   | 88.51%                         |
| <b>M004</b> | Normal       | 84,767,438             | 76X   | 87.34%                         |
|             | Tumor-PB     | 85,970,578             | 81X   | 87.40%                         |
| <b>M006</b> | Normal       | 81,218,737             | 67X   | 86.49%                         |
|             | Tumor-PB     | 75,579,744             | 62X   | 83.21%                         |
| <b>M007</b> | Normal       | 88,771,344             | 76X   | 88.43%                         |
|             | Tumor-Colon  | 97,448,384             | 77X   | 87.74%                         |
| <b>M008</b> | Normal       | 111,347,503            | 98X   | 88.74%                         |
|             | Tumor-PB     | 115,253,745            | 105X  | 88.61%                         |
| <b>M009</b> | Normal       | 123,080,801            | 99X   | 87.90%                         |
|             | Tumor-PB     | 111,038,294            | 89X   | 87.59%                         |
| <b>M010</b> | Normal       | 99,020,306             | 75X   | 85.38%                         |
|             | Tumor-PB     | 82,125,287             | 69X   | 85.29%                         |
|             | Tumor-LN     | 133,192,890            | 102X  | 88.65%                         |
| <b>M011</b> | Normal       | 90,848,586             | 73X   | 86.11%                         |
|             | Tumor-LN     | 97,638,239             | 75X   | 86.06%                         |
| <b>M012</b> | Normal       | 106,309,955            | 85X   | 87.06%                         |
|             | Tumor-LN     | 120,019,051            | 96X   | 87.49%                         |
| <b>M013</b> | Normal       | 103,462,261            | 85X   | 87.48%                         |
|             | Tumor-LN     | 111,265,949            | 90X   | 86.76%                         |
| <b>M014</b> | Normal       | 93,672,497             | 76X   | 86.30%                         |
|             | Tumor-LN     | 128,802,461            | 103X  | 88.32%                         |
| <b>M015</b> | Normal       | 117,177,410            | 94X   | 87.93%                         |
|             | Tumor-PB     | 117,299,513            | 96X   | 88.07%                         |
| <b>M016</b> | Normal       | 77,156,805             | 63X   | 84.30%                         |
|             | Tumor-PB     | 81,110,925             | 62X   | 84.30%                         |
|             | Tumor-Spleen | 74,399,590             | 64X   | 86.96%                         |
| <b>M018</b> | Normal       | 91,677,570             | 73X   | 84.94%                         |
|             | Tumor-PB     | 96,710,099             | 76X   | 85.67%                         |
| <b>M019</b> | Normal       | 89,761,722             | 76X   | 87.08%                         |
|             | Tumor-PB     | 104,490,136            | 87X   | 87.60%                         |
| <b>M020</b> | Normal       | 109,514,955            | 93X   | 88.46%                         |
|             | Tumor-PB     | 99,839,051             | 83X   | 88.52%                         |



|                |           |             |     |        |
|----------------|-----------|-------------|-----|--------|
| <b>M021</b>    | Normal    | 70,547,300  | 56X | 84.13% |
|                | Tumor-PB  | 82,048,947  | 65X | 85.91% |
| <b>M022</b>    | Normal    | 72,584,193  | 62X | 85.69% |
|                | Tumor-LN  | 77,277,173  | 61X | 85.67% |
| <b>M023</b>    | Normal    | 97,654,402  | 87X | 88.46% |
|                | Tumor-PB  | 87,685,153  | 77X | 87.48% |
|                | Tumor-LN  | 112,118,398 | 97X | 89.46% |
| <b>M024</b>    | Normal    | 68,869,934  | 60X | 87.15% |
|                | Tumor-LN  | 45,120,771  | 40X | 82.85% |
| <b>M025</b>    | Normal    | 99,991,928  | 90X | 88.78% |
|                | Tumor-LN  | 74,270,156  | 64X | 86.77% |
| <b>M026</b>    | Normal    | 83,435,018  | 72X | 88.17% |
|                | Tumor-PB  | 89,355,122  | 80X | 88.17% |
|                | Tumor-LN  | 87,973,822  | 75X | 87.95% |
| <b>M027</b>    | Normal    | 107,534,375 | 91X | 88.82% |
|                | Tumor-PB  | 83,413,356  | 71X | 88.22% |
| <b>M028</b>    | Normal    | 95,178,168  | 82X | 88.42% |
|                | Tumor-PB  | 83,686,638  | 72X | 88.13% |
| <b>M029</b>    | Normal    | 93,649,408  | 79X | 88.81% |
|                | Tumor-PB  | 95,807,367  | 83X | 89.23% |
| <b>M030</b>    | Normal    | 77,072,181  | 69X | 87.31% |
|                | Tumor-PB  | 95,518,986  | 81X | 88.85% |
| <b>M031</b>    | Normal    | 76,749,633  | 70X | 87.84% |
|                | Tumor-PB  | 88,140,720  | 79X | 88.84% |
|                | Tumor-LN  | 82,777,634  | 75X | 88.59% |
| <b>JEKO</b>    | Cell line | 87,278,089  | 64X | 86.7%  |
| <b>MAVER-1</b> | Cell line | 97,178,008  | 87X | 88.6%  |
| <b>MINO</b>    | Cell line | 84,337,209  | 52X | 86.1%  |
| <b>REC-1</b>   | Cell line | 90,662,693  | 77X | 88.3%  |
| <b>JVM-2</b>   | Cell line | 86,788,244  | 77X | 88.4%  |
| <b>Z138</b>    | Cell line | 117,046,791 | 85X | 89.1%  |

\*These samples were obtained 3.2 (M002) and 3.5 (M003) years after diagnosis.

**Table S7.** Breakpoints of t(11;14)(q13;q32) translocation by WGS according to the mutational status of *IGHV* gene and SOX11 expression.

| <b>Case</b> | <b>Breakpoint<br/>chr 14</b> | <b>Breakpoint<br/>chr 11</b> | <b>SOX11</b> | <b>% <i>IGHV</i><br/>identity</b> | <b><i>IGHV</i></b> | <b><i>IGHD</i></b> | <b><i>IGHJ</i></b> |
|-------------|------------------------------|------------------------------|--------------|-----------------------------------|--------------------|--------------------|--------------------|
| <b>M001</b> | 106329438                    | 69452394                     | positive     | 98.80                             | <i>IGHV3-21</i>    | <i>IGHD3-9</i>     | <i>IGHJ3</i>       |
| <b>M002</b> | 106330070                    | 69440168                     | positive     | 99.55                             | <i>IGHV4-34</i>    | <i>IGHD2-15</i>    | <i>IGHJ6</i>       |
| <b>M003</b> | 106329444                    | 69355770                     | negative     | 93.72                             | <i>IGHV3-23</i>    | <i>IGHD3-16</i>    | <i>IGHJ4</i>       |
| <b>M004</b> | 106329465                    | 69346208                     | negative     | 96.99                             | <i>IGHV1-8</i>     | <i>IGHD2-2</i>     | <i>IGHJ5</i>       |

**Table S8.** Foci of hypermutations or kataegis in three of the four MCL cases analyzed by WGS.

| Case         | Chromosome | Start    | No. mutations | Genes          |
|--------------|------------|----------|---------------|----------------|
| <b>M002</b>  | 9          | 21482492 | 5             | <i>MIR31HG</i> |
| <b>M002</b>  | 9          | 22296196 | 6             | -              |
| <b>M003</b>  | 4          | 25809285 | 7             | <i>SEL1L3</i>  |
| <b>M003</b>  | 7          | 52167851 | 6             | -              |
| <b>M003</b>  | 11         | 69453595 | 14            | <i>CCND1</i>   |
| <b>M003*</b> | 4          | 25809285 | 7             | <i>SEL1L3</i>  |
| <b>M003*</b> | 7          | 52167851 | 6             | -              |
| <b>M003*</b> | 11         | 69453595 | 14            | <i>CCND1</i>   |
| <b>M004</b>  | 11         | 69455892 | 17            | <i>CCND1</i>   |
| <b>M004</b>  | 13         | 56648266 | 5             | -              |

The foci of hypermutations in the three immunoglobulin genes were excluded from the table.

\* Sequential sample of patient M003 obtained 3.5 years after diagnosis.

**Table S9.** MCL mutations identified by WES and Sanger sequencing.

| Gene         | Case                                     | Exon   | Mutation              | Total frequency | Frequency of mutations in SOX11+ MCL | Frequency of mutations in SOX11- MCL | Frequency of mutations in IGHV-U MCL | Frequency of mutations in IGHV-M MCL |
|--------------|------------------------------------------|--------|-----------------------|-----------------|--------------------------------------|--------------------------------------|--------------------------------------|--------------------------------------|
| <i>ATM</i>   | M006                                     | 50     | p.Q1448A              | 41.4% (12/29)   | 54.5% (12/22)*                       | 0/7*                                 | 50% (8/16)                           | 25% (3/12)                           |
| <i>ATM</i>   | M008                                     | 8; 56  | p.I323V; p.Q2730R     |                 |                                      |                                      |                                      |                                      |
| <i>ATM</i>   | M010                                     | 63     | p.R3008C              |                 |                                      |                                      |                                      |                                      |
| <i>ATM</i>   | M012                                     | 51     | p.R2526S              |                 |                                      |                                      |                                      |                                      |
| <i>ATM</i>   | M013                                     | 50     | p.Y2437S              |                 |                                      |                                      |                                      |                                      |
| <i>ATM</i>   | M014                                     | 56     | p.V2727A              |                 |                                      |                                      |                                      |                                      |
| <i>ATM</i>   | M020                                     | 39     | p.E1959K              |                 |                                      |                                      |                                      |                                      |
| <i>ATM</i>   | M022                                     | 43; 49 | p.W2104*; p.L2427L    |                 |                                      |                                      |                                      |                                      |
| <i>ATM</i>   | M024                                     | 47     | p.A2308T              |                 |                                      |                                      |                                      |                                      |
| <i>ATM</i>   | M025                                     | 47; 55 | p.Q2297*; p.G2694K    |                 |                                      |                                      |                                      |                                      |
| <i>ATM</i>   | M030                                     | 7; 11  | p.R248Q; p.T593fs*20; |                 |                                      |                                      |                                      |                                      |
| <i>ATM</i>   | M031                                     | 32; 50 | p.R.1618*; p.S2489F   |                 |                                      |                                      |                                      |                                      |
| <i>CCND1</i> | M002                                     | 1      | p.C47S                | 34.5% (10/29)   | 18.2% (4/22)†                        | 6/7 (85.7%)†                         | 18.7% (3/16)‡                        | 58.3% (7/12)‡                        |
| <i>CCND1</i> | M003, M011                               | 1      | p.Y44S                |                 |                                      |                                      |                                      |                                      |
| <i>CCND1</i> | M004                                     | 1      | p.Y44Q                |                 |                                      |                                      |                                      |                                      |
| <i>CCND1</i> | M009                                     | 1      | p.Y44D                |                 |                                      |                                      |                                      |                                      |
| <i>CCND1</i> | M015                                     | 1      | p.Y44D                |                 |                                      |                                      |                                      |                                      |
| <i>CCND1</i> | M018                                     | 1      | p.C47S                |                 |                                      |                                      |                                      |                                      |
| <i>CCND1</i> | M022                                     | 5      | p.V290G               |                 |                                      |                                      |                                      |                                      |
| <i>CCND1</i> | M021                                     | 1      | p.K46E                |                 |                                      |                                      |                                      |                                      |
| <i>CCND1</i> | M027                                     | 1      | p.V42E; p.S41T        |                 |                                      |                                      |                                      |                                      |
| <i>MLL2</i>  | M002                                     | 49     | p.A5272P              | 13.8% (4/29)    | 18.2% (4/22)                         | 0/7                                  | 12.5% (2/16)                         | 16.6% (2/12)                         |
| <i>MLL2</i>  | M012                                     | 33     | p.R2771*              |                 |                                      |                                      |                                      |                                      |
| <i>MLL2</i>  | M024                                     | 21     | p.D1724fs*7           |                 |                                      |                                      |                                      |                                      |
| <i>MLL2</i>  | M030                                     | 39     | p.Q3604*              |                 |                                      |                                      |                                      |                                      |
| <i>MLL2</i>  | JEKO-1                                   | 48     | p.R5225C              |                 |                                      |                                      |                                      |                                      |
| <i>MLL2</i>  | JVM-2                                    | 34     | p.S2839*              |                 |                                      |                                      |                                      |                                      |
| <i>WHSC1</i> | M022, M023, M034, M162, M198, M200, M209 | 18     | p.E1099K              | 10% (13/130)    | 14.6% (12/82)§                       | 0/31§                                | 14% (11/80)                          | 2.8% (1/35)                          |
| <i>WHSC1</i> | M008, M029, M088, M129, M199, M214       | 19     | p.T1150A              |                 |                                      |                                      |                                      |                                      |

|               |                                    |    |                 |               |             |             |             |             |
|---------------|------------------------------------|----|-----------------|---------------|-------------|-------------|-------------|-------------|
| <i>BIRC3</i>  | M009                               | 9  | p.Q552*         | 6.4% (11/173) | 7.3% (7/95) | 7.1% (2/28) | 9.2% (9/97) | 2.9% (1/34) |
| <i>BIRC3</i>  | M014                               | 9  | p.C560Y         |               |             |             |             |             |
| <i>BIRC3</i>  | M019                               | 9  | Splice site     |               |             |             |             |             |
| <i>BIRC3</i>  | M073                               | 9  | p.R550*         |               |             |             |             |             |
| <i>BIRC3</i>  | M079                               | 9  | p.L575V         |               |             |             |             |             |
| <i>BIRC3</i>  | M095                               | 9  | p.K563*         |               |             |             |             |             |
| <i>BIRC3</i>  | M104                               | 9  | p.R591fs*1      |               |             |             |             |             |
| <i>BIRC3</i>  | M164                               | 9  | Large insertion |               |             |             |             |             |
| <i>BIRC3</i>  | M179                               | 9  | p.T556fs*11     |               |             |             |             |             |
| <i>BIRC3</i>  | M212                               | 9  | p.R600G         |               |             |             |             |             |
| <i>BIRC3</i>  | M221                               | 9  | p.C557G         |               |             |             |             |             |
| <i>NOTCH2</i> | M029, M124, M200, M237             | 34 | p.R2400*        | 5.2% (9/172)  | 6.5% (6/93) | 3.4% (1/29) | 6.3% (6/95) | 5.7% (2/35) |
| <i>NOTCH2</i> | M053                               | 34 | p.Q2360*        |               |             |             |             |             |
| <i>NOTCH2</i> | M093                               | 34 | p.H2293fs*2     |               |             |             |             |             |
| <i>NOTCH2</i> | M105                               | 34 | p.K2292fs*20    |               |             |             |             |             |
| <i>NOTCH2</i> | M128                               | 34 | p.S2391fs*2     |               |             |             |             |             |
| <i>NOTCH2</i> | M190                               | 34 | p.Q2285*        |               |             |             |             |             |
| <i>NOTCH1</i> | M074, M082, M105, M107, M164, M193 | 34 | p.P2515fs*4     | 4.6% (8/172)  | 5.3% (5/95) | 0/27        | 7.4% (7/95) | 2.8% (1/35) |
| <i>NOTCH1</i> | M085                               | 34 | p.V2504fs*3     |               |             |             |             |             |
| <i>NOTCH1</i> | M096                               | 34 | p.G2281fs*72    |               |             |             |             |             |
| <i>NOTCH1</i> | MINO                               | 34 | p.Q2487*        |               |             |             |             |             |
| <i>NOTCH1</i> | REC-1                              | 34 | p.H2428fs*7     |               |             |             |             |             |
| <i>MEF2B</i>  | M012, M013, M034, M099, M122, M224 | 2  | p.K23R          | 3.2% (6/187)  | 5% (5/100)  | 2.7% (1/36) | 4% (4/102)  | 4.6% (2/43) |
| <i>MEF2B</i>  | REC-1                              | 2  | p.N49S          |               |             |             |             |             |
| <i>TLR2</i>   | M003                               | 1  | p.D327V         | 1.2% (2/171)  | 0/94        | 6.8% (2/29) | 0/96        | 5.7% (2/35) |
| <i>TLR2</i>   | M021                               | 1  | p.Y298S         |               |             |             |             |             |

Data from whole-exome sequencing in 29 primary tumors and from Sanger sequencing in 172 MCL cases from the validation series. Mutations of these genes in the 9 cell lines studied are indicated but not considered in the frequency values. *IGHV*-M: mutated *IGHV* gene; *IGHV*-U: unmutated *IGHV* gene.

\**P*-value=0.023; †*P*-value=0.003; ‡*P*-value= 0.05; and § *P*-value= 0.034.

**Table S10.** Regions of copy number and CNN-LOH identified in the 29 MCL from the exome series (Hg19).

| Sample      | Chromosome                    | Start     | End        | Aberration Type | Segment size (Kb) | Band            | No. Probes |
|-------------|-------------------------------|-----------|------------|-----------------|-------------------|-----------------|------------|
| M001-PB     |                               |           |            |                 |                   |                 |            |
| M001-PB     | chr3                          | 118228538 | 197962430  | Gain            | 79791             | q13.32 - q29    | 50174      |
| M001-PB     | chr5                          | 10001     | 669793     | Gain            | 723               | p15.33          | 307        |
| M001-PB     | chr5                          | 1131169   | 1633450    | Amplification   | 502               | p15.33          | 308        |
| M001-PB     | chr5                          | 4336320   | 12109540   | Gain            | 7773              | p15.33 - p15.2  | 6831       |
| M001-PB     | chr5                          | 49459042  | 49930748   | Gain            | 472               | q11.1           | 182        |
| M001-PB     | chr6                          | 75087596  | 78517856   | Gain            | 3430              | q13 - q14.1     | 2202       |
| M001-PB     | chr6                          | 79448530  | 80355169   | Gain            | 907               | q14.1           | 547        |
| M001-PB     | chr6                          | 80737260  | 171055067  | Loss            | 90106             | q14.1 - q27     | 60076      |
| M001-PB     | chr8                          | 40642     | 26893704   | Loss            | 26919             | p23.3 - p21.2   | 24256      |
| M001-PB     | chr10                         | 110027    | 21948498   | Loss            | 21888             | p15.3 - p12.31  | 18275      |
| M001-PB     | chr10                         | 22602820  | 22705943   | Gain            | 103               | p12.31          | 52         |
| M001-PB     | chr10                         | 22982715  | 26122776   | Gain            | 3140              | p12.2 - p12.1   | 2207       |
| M001-PB     | chr10                         | 26709813  | 27920184   | Gain            | 1210              | p12.1           | 823        |
| M001-PB     | chr10                         | 31874561  | 35324983   | Gain            | 3450              | p11.22 - p11.21 | 2387       |
| M001-PB     | chr15                         | 40586080  | 49772806   | Loss            | 9187              | q15.1 - q21.1   | 5157       |
| M001-PB     | chr15                         | 53907813  | 59453515   | Loss            | 5546              | q21.3 - q22.2   | 3854       |
| M001-PB     | chr15                         | 77296172  | 78597748   | Loss            | 1302              | q24.3 - q25.1   | 688        |
| M001-PB     | chr15                         | 85550484  | 102453674  | Loss            | 16920             | q25.3 - q26.3   | 13142      |
| M001-PB     | chr18                         | 10001     | 921791     | Loss            | 912               | p11.32          | 687        |
| M001-PB     | chr18                         | 953961    | 77931412   | Gain            | 75088             | p11.32 - q23    | 51306      |
| M001-PB     | chr20                         | 35716451  | 45537371   | Loss            | 9821              | q11.23 - q13.12 | 7015       |
| M001-PB     | chr21                         | 36205735  | 38336700   | Loss            | 2131              | q22.12 - q22.13 | 1621       |
| M001-PB     | chr21                         | 42131041  | 48119895   | Loss            | 5891              | q22.2 - q22.3   | 4068       |
| M001-LN     |                               |           |            |                 |                   |                 |            |
| M001-LN     | Same alterations than M001-PB |           |            |                 |                   |                 |            |
| M002-Tonsil |                               |           |            |                 |                   |                 |            |
| M002-Tonsil | chr1                          | 92441110  | 112610039  | Loss            | 20198             | p22.1 - p13.2   | 12982      |
| M002-Tonsil | chr7                          | 10238     | 159128663  | Gain            | 158821            | p22.3 - q36.3   | 100943     |
| M002-Tonsil | chr9                          | 19944309  | 21447292   | Loss            | 1503              | p21.3           | 1221       |
| M002-Tonsil | chr9                          | 21486917  | 22258314   | Homozygous Loss | 771               | p21.3           | 589        |
| M002-Tonsil | chr9                          | 22263398  | 23,132,697 | Loss            | 869               | p21.3           | 578        |
| M002-Tonsil | chr9                          | 70459309  | 119909343  | Loss            | 49250             | q12 - q33.1     | 36113      |
| M002-Tonsil | chr12                         | 7266783   | 16848153   | Loss            | 9581              | p13.31 - p12.3  | 6459       |
| M002-Tonsil | chr13                         | 50488933  | 91937630   | Loss            | 41349             | q14.3 - q31.3   | 26247      |
| M002-Tonsil | chr13                         | 91959820  | 92907213   | Amplification   | 947               | q31.3           | 649        |

|             |       |           |           |                    |        |                    |       |
|-------------|-------|-----------|-----------|--------------------|--------|--------------------|-------|
| M002-Tonsil | chr13 | 92907213  | 96843698  | Loss               | 3936   | q31.3 - q32.1      | 2778  |
| M002-Tonsil | chr13 | 96843698  | 98643681  | Homozygous<br>Loss | 1800   | q32.1 - q32.2      | 1137  |
| M002-Tonsil | chr13 | 98643681  | 115109878 | Loss               | 16701  | q32.2 - q34        | 12433 |
| M002-PB*    |       |           |           |                    |        |                    |       |
| M002-PB*    | chr1  | 92719701  | 116092430 | Loss               | 23402  | p22.1 - p13.2      | 15112 |
| M002-PB*    | chr4  | 163826497 | 174889279 | Gain               | 11080  | q32.2 - q34.1      | 6991  |
| M002-PB*    | chr4  | 175912522 | 191029082 | Gain               | 15124  | q34.1 - q35.2      | 10757 |
| M002-PB*    | chr6  | 127627822 | 168076129 | Loss               | 40149  | q22.33 - q27       | 28336 |
| M002-PB*    | chr6  | 168090016 | 170940576 | Homozygous<br>Loss | 2950   | q27                | 2003  |
| M002-PB*    | chr8  | 111196706 | 111377912 | Loss               | 181    | q23.2              | 84    |
| M002-PB*    | chr8  | 112727257 | 113735049 | Gain               | 1008   | q23.3              | 556   |
| M002-PB*    | chr9  | 70459309  | 119909343 | Loss               | 49250  | q13 - q33.1        | 35328 |
| M002-PB*    | chr11 | 111162358 | 115328488 | Loss               | 4166   | q23.1 - q23.2      | 2943  |
| M002-PB*    | chr12 | 7266783   | 16848153  | Loss               | 9581   | p13.31 -<br>p12.3  | 6459  |
| M002-PB*    | chr13 | 50488933  | 115109878 | Loss               | 64820  | q14.3 - q34        | 43286 |
| M002-PB*    | chr17 | 0         | 18565792  | CNN-LOH            | 18507  | p13.3 - p11.2      | 11878 |
| M003-PB     |       |           |           |                    |        |                    |       |
| M003-PB     | chr17 | 0         | 22263006  | Loss               | 22200  | p13.3 - q11.1      | 13449 |
| M003-PB*    |       |           |           |                    |        |                    |       |
| M003-PB*    | chr3  | 67963843  | 68626981  | Loss               | 663    | p14.1              | 462   |
| M003-PB*    | chr3  | 68740108  | 197962430 | Gain               | 130679 | p14.1 - q29        | 78692 |
| M003-PB*    | chr4  | 70508182  | 70747314  | Loss               | 239    | q13.3              | 137   |
| M003-PB*    | chr4  | 70747315  | 71810114  | Gain               | 1247   | q13.3              | 631   |
| M003-PB*    | chr4  | 71810114  | 74531882  | Loss               | 2722   | q13.3              | 1598  |
| M003-PB*    | chr4  | 114329605 | 115160104 | Loss               | 831    | q26                | 583   |
| M003-PB*    | chr4  | 115183202 | 115730796 | Gain               | 548    | q26                | 350   |
| M003-PB*    | chr4  | 115730796 | 116036778 | Loss               | 306    | q26                | 195   |
| M003-PB*    | chr4  | 116036778 | 126765787 | Gain               | 10726  | q26 - q28.1        | 6556  |
| M003-PB*    | chr4  | 190778400 | 191029082 | Gain               | 258    | q35.2              | 70    |
| M003-PB*    | chr8  | 66646199  | 146304022 | Gain               | 79466  | q13.1 - q24.3      | 51319 |
| M003-PB*    | chr12 | 145739    | 8982647   | Gain               | 8874   | p13.33 -<br>p13.31 | 6014  |
| M003-PB*    | chr12 | 8982660   | 9192134   | Loss               | 209    | p13.31             | 141   |
| M003-PB*    | chr12 | 9193286   | 9275102   | Gain               | 81     | p13.31             | 54    |
| M003-PB*    | chr12 | 9275103   | 15622186  | Loss               | 6347   | p13.31 -<br>p12.3  | 4607  |
| M003-PB*    | chr12 | 15622187  | 15890740  | Gain               | 269    | p12.3              | 144   |
| M003-PB*    | chr12 | 15890740  | 17368844  | Loss               | 1478   | p12.3              | 937   |
| M003-PB*    | chr12 | 46243873  | 47284789  | Loss               | 1041   | q12 - q13.11       | 590   |
| M003-PB*    | chr12 | 47304835  | 79376245  | Gain               | 32309  | q13.11 -<br>q21.2  | 20398 |
| M003-PB*    | chr12 | 79378845  | 80533230  | Loss               | 1154   | q21.2 -<br>q21.31  | 675   |
| M003-PB*    | chr17 | 0         | 22263006  | Loss               | 22200  | p13.3 - q11.1      | 13449 |
| M004-PB     |       |           |           |                    |        |                    |       |
| M004-PB     | chr1  | 179776977 | 249233096 | Loss               | 69206  | q25.2 - q44        | 48500 |

|            |                |           |           |               |        |                 |       |
|------------|----------------|-----------|-----------|---------------|--------|-----------------|-------|
| M004-PB    | chr8           | 10001     | 43838887  | Loss          | 43974  | p23.3 - p11.1   | 34658 |
| M004-PB    | chr13          | 50417633  | 51459447  | Loss          | 1042   | q14.3           | 653   |
| M004-PB    | chr16          | 79059660  | 79608761  | Gain          | 549    | q23.1           | 656   |
| M004-PB    | chr17          | 0         | 22263006  | Loss          | 22200  | p13.3 - q11.1   | 13449 |
| M004-PB    | chr18          | 64736967  | 65074844  | Gain          | 338    | q22.1           | 260   |
| M006-PB    |                |           |           |               |        |                 |       |
| M006-PB    | chr1           | 22275416  | 32683292  | Loss          | 10308  | p36.12 - p35.1  | 5650  |
| M006-PB    | chr1           | 152746697 | 174782872 | Loss          | 22036  | q21.3 - q25.1   | 15285 |
| M006-PB    | chr4           | 62171342  | 94286034  | Loss          | 32651  | q13.1 - q22.2   | 19910 |
| M006-PB    | chr5           | 10000     | 1348012   | Gain          | 1401   | p15.33          | 641   |
| M006-PB    | chr8           | 10001     | 36140133  | Loss          | 36260  | p23.3 - p12     | 30253 |
| M006-PB    | chr8           | 36172446  | 146117505 | Gain          | 109796 | p12 - q24.3     | 67822 |
| M006-PB    | chr10          | 60001     | 572671    | Loss          | 563    | p15.3           | 303   |
| M006-PB    | chr10          | 609825    | 17251652  | Loss          | 16692  | p15.3 - p13     | 14583 |
| M006-PB    | chr10          | 17272707  | 34661687  | Gain          | 17389  | p12.33 - p11.21 | 12446 |
| M006-PB    | chr11          | 104857579 | 112252510 | Loss          | 7395   | q22.3 - q23.1   | 4803  |
| M006-PB    | chr12          | 145739    | 2419151   | Gain          | 2289   | p13.33          | 1468  |
| M006-PB    | chr12          | 3311443   | 6257833   | Gain          | 2946   | p13.32 - p13.31 | 2601  |
| M006-PB    | chr12          | 7241152   | 9875493   | Gain          | 2639   | p13.31          | 1400  |
| M006-PB    | chr12          | 10417982  | 17114750  | Loss          | 6697   | p13.2 - p12.3   | 4829  |
| M006-PB    | chr12          | 17119643  | 22895822  | Amplification | 5776   | p12.3 - p12.1   | 3792  |
| M006-PB    | chr12          | 22954573  | 25370445  | Loss          | 2416   | p12.1           | 1836  |
| M006-PB    | chr17          | 42958765  | 81060000  | Gain          | 38460  | q21.31 - q25.3  | 23053 |
| M006-PB    | chr18          | 54852270  | 78016181  | Gain          | 23114  | q21.31 - q23    | 17293 |
| M006-PB    | chr21          | 14354777  | 24404829  | Loss          | 10050  | q11.2 - q21.2   | 7091  |
| M006-PB    | chr21          | 27155370  | 33211849  | Loss          | 6056   | q21.3 - q22.11  | 4579  |
| M006-PB    | chr12          | 17697264  | 22854564  | CNN-LOH       | 5157   | p12.3 - p12.1   | 1617  |
| M007-Colon |                |           |           |               |        |                 |       |
| M007-Colon | chr9           | 10002     | 141153431 | Loss          | 140273 | p24.3 - q34.3   | 82094 |
| M007-Colon | chr1           | 72445714  | 117234591 | Loss          | 44818  | p31.1 - p13.1   | 29553 |
| M007-Colon | chr11          | 93530173  | 117676671 | Loss          | 24012  | q21 - q23.3     | 17356 |
| M008-PB    |                |           |           |               |        |                 |       |
| M008-PB    | chr1           | 62367186  | 109308733 | Loss          | 46970  | p31.3 - p13.3   | 31088 |
| M008-PB    | chr3           | 124624944 | 197962430 | Gain          | 73394  | q21.2 - q29     | 46269 |
| M008-PB    | chr4           | 181756054 | 181963383 | Loss          | 207    | q34.3           | 148   |
| M008-PB    | chr10          | 60000     | 39088250  | Gain          | 39128  | p15.3 - p11.1   | 29962 |
| M008-PB    | chr12          | 9354560   | 13902910  | Loss          | 4548   | p13.31 - p13.1  | 3483  |
| M008-PB    | chr17          | 0         | 9423484   | Loss          | 9364   | p13.3 - p13.1   | 5530  |
| M008-PB    | chr22          | 16619782  | 51244566  | Loss          | 34692  | q11.1 - q13.33  | 24376 |
| M009-PB    |                |           |           |               |        |                 |       |
| M009-PB    | No alterations |           |           |               |        |                 |       |
| M009-PB*   |                |           |           |               |        |                 |       |



|          |                               |           |           |               |       |                 |       |
|----------|-------------------------------|-----------|-----------|---------------|-------|-----------------|-------|
| M009-PB* | No alterations                |           |           |               |       |                 |       |
| M010-PB  |                               |           |           |               |       |                 |       |
| M010-PB  | chr3                          | 129233155 | 197962430 | Gain          | 68786 | q21.3 - q29     | 43476 |
| M010-PB  | chr4                          | 10001     | 11783917  | Gain          | 11393 | p16.3 - p15.33  | 7525  |
| M010-PB  | chr6                          | 84360191  | 94020647  | Gain          | 9660  | q14.2 - q16.1   | 6361  |
| M010-PB  | chr6                          | 94056956  | 171014636 | Loss          | 76743 | q16.1 - q27     | 51328 |
| M010-PB  | chr8                          | 66827451  | 146304022 | Gain          | 79285 | q13.1 - q24.3   | 51242 |
| M010-PB  | chr10                         | 60000     | 1720790   | Loss          | 1711  | p15.3           | 1159  |
| M010-PB  | chr10                         | 1894011   | 21061431  | Loss          | 19217 | p15.3 - p12.1   | 16395 |
| M010-PB  | chr10                         | 21061431  | 25691351  | Amplification | 4629  | p12.31-p12.1    | 2945  |
| M010-PB  | chr10                         | 25691351  | 26738039  | Loss          | 1047  | p12.1           | 812   |
| M010-PB  | chr10                         | 26740330  | 34256021  | Amplification | 7516  | p12.1 - p11.22  | 5587  |
| M010-PB  | chr10                         | 34273216  | 34393099  | Loss          | 120   | p11.22          | 79    |
| M010-PB  | chr10                         | 34396074  | 43742726  | Amplification | 8627  | p11.22 - q11.21 | 3504  |
| M010-PB  | chr11                         | 90462909  | 114353338 | Loss          | 23756 | q14.3 - q23.2   | 17159 |
| M010-PB  | chr11                         | 122800174 | 122911190 | Gain          | 111   | q24.1           | 99    |
| M010-PB  | chr11                         | 127804127 | 131062373 | Gain          | 3258  | q24.2 - q25     | 2517  |
| M010-PB  | chr11                         | 132937952 | 134128707 | Gain          | 1191  | q25             | 882   |
| M010-PB  | chr12                         | 38265653  | 52271159  | Loss          | 14006 | q12 - q13.13    | 8357  |
| M010-PB  | chr12                         | 52334865  | 126938225 | Gain          | 74883 | q13.13 - q24.32 | 49083 |
| M010-PB  | chr13                         | 19040087  | 30246342  | Gain          | 11206 | q11 - q12.3     | 8211  |
| M010-PB  | chr13                         | 30262179  | 30367290  | Loss          | 105   | q12.3           | 66    |
| M010-PB  | chr13                         | 30808973  | 115109878 | Loss          | 84436 | q12.3 - q34     | 57308 |
| M010-PB  | chr15                         | 22574003  | 27084903  | Gain          | 4561  | q11.2 - q12     | 2852  |
| M010-PB  | chr15                         | 27088958  | 48451277  | Loss          | 21599 | q12 - q21.1     | 13330 |
| M010-PB  | chr15                         | 48480278  | 59178707  | Gain          | 10698 | q21.1 - q22.1   | 7211  |
| M010-PB  | chr15                         | 59178707  | 61016476  | Loss          | 1838  | q22.1 - q22.2   | 1322  |
| M010-PB  | chr15                         | 61056591  | 86197895  | Gain          | 25155 | q22.2 - q25.3   | 15444 |
| M010-PB  | chr15                         | 86243890  | 102521392 | Loss          | 16294 | q25.3 - q26.3   | 12712 |
| M010-PB  | chr16                         | 69881232  | 90294753  | Loss          | 20389 | q22.1 - q24.3   | 17120 |
| M010-PB  | chr18                         | 10001     | 78016181  | Gain          | 76117 | p11.32 - q23    | 52074 |
| M010-PB  | chr22                         | 23222285  | 34580262  | Loss          | 11358 | q11.22 - q12.3  | 8690  |
| M010-PB  | chr22                         | 34749460  | 35414802  | Loss          | 665   | q12.3           | 657   |
| M010-PB  | chr22                         | 50438629  | 51244566  | Loss          | 911   | q13.33          | 366   |
| M010-LN  |                               |           |           |               |       |                 |       |
| M010-LN  | Same alterations than M010-PB |           |           |               |       |                 |       |
| M011-LN  |                               |           |           |               |       |                 |       |
| M011-LN  | chr2                          | 59485760  | 70962728  | Gain          | 11477 | p16.1 - p13.3   | 7520  |
| M011-LN  | chr7                          | 10238     | 55150251  | Gain          | 55118 | p22.3 - p11.2   | 40167 |
| M011-LN  | chr13                         | 45439558  | 115085462 | Loss          | 69766 | q14.12 - q34    | 46598 |
| M011-LN  | chr20                         | 24956036  | 62965520  | CNN-LOH       | 37532 | p11.21 - q13.33 | 11906 |
| M012-LN  |                               |           |           |               |       |                 |       |

|             |                |           |           |         |        |                 |       |
|-------------|----------------|-----------|-----------|---------|--------|-----------------|-------|
| M012-LN     | chr1           | 66392830  | 114699474 | Loss    | 48336  | p31.3 - p13.2   | 31835 |
| M012-LN     | chr11          | 75958707  | 116614665 | Loss    | 40484  | q13.5 - q23.3   | 28896 |
| M012-LN     | chr11          | 116623872 | 134926481 | Gain    | 18303  | q23.3 - q25     | 13898 |
| M012-LN     | chr11          | 69314155  | 75846643  | Gain    | 6501   | q13.2 - q13.5   | 3599  |
| M012-LN     | chr14          | 27215007  | 107289540 | CNN-LOH | 80084  | q12 - q32.33    | 25533 |
| M013-LN     |                |           |           |         |        |                 |       |
| M013-LN     | chr11          | 94439147  | 116616201 | Loss    | 22043  | q21 - q23.3     | 15975 |
| M013-LN     | chr19          | 60000     | 20771689  | Loss    | 20564  | p13.3 - p12     | 9412  |
| M014-LN     |                |           |           |         |        |                 |       |
| M014-LN     | chr1           | 26345580  | 27980718  | Loss    | 1635   | p36.11 - p35.3  | 669   |
| M014-LN     | chr1           | 48813881  | 109293627 | Loss    | 60509  | p33 - p13.3     | 40223 |
| M014-LN     | chr4           | 10001     | 34068651  | Loss    | 33745  | p16.3 - p15.1   | 23016 |
| M014-LN     | chr4           | 66024549  | 66580419  | Loss    | 556    | q13.1           | 392   |
| M014-LN     | chr4           | 66801389  | 190965327 | Gain    | 124718 | q13.2 - q35.2   | 78347 |
| M014-LN     | chr6           | 60000     | 17711354  | Gain    | 17819  | p25.3 - p22.3   | 14176 |
| M014-LN     | chr7           | 97333932  | 105169119 | Loss    | 7784   | q21.3 - q22.2   | 3971  |
| M014-LN     | chr7           | 133754314 | 142048195 | Loss    | 8447   | q33 - q34       | 5773  |
| M014-LN     | chr9           | 118631656 | 123768423 | Gain    | 5137   | q33.1 - q33.2   | 4254  |
| M014-LN     | chr11          | 94944462  | 115392644 | Loss    | 20314  | q21 - q23.2     | 14596 |
| M014-LN     | chr12          | 51745585  | 133690335 | Gain    | 82169  | q13.13 - q24.33 | 54714 |
| M014-LN     | chr13          | 30039657  | 114996266 | Loss    | 85077  | q12.3 - q34     | 57860 |
| M015-PB     |                |           |           |         |        |                 |       |
| M015-PB     | chr4           | 169755354 | 191029082 | CNN-LOH | 21281  | q32.3 - q35.2   | 7187  |
| M016-PB     |                |           |           |         |        |                 |       |
| M016-PB     | No alterations |           |           |         |        |                 |       |
| M016-Spleen |                |           |           |         |        |                 |       |
| M016-Spleen | No alterations |           |           |         |        |                 |       |
| M018-PB     |                |           |           |         |        |                 |       |
| M018-PB     | chr1           | 222856225 | 249233096 | Loss    | 26327  | q41 - q44       | 18772 |
| M018-PB     | chr3           | 60000     | 3274288   | Loss    | 3249   | p26.3           | 2954  |
| M018-PB     | chr3           | 3281997   | 10038512  | Gain    | 6757   | p26.3 - p25.3   | 5841  |
| M018-PB     | chr3           | 10081168  | 48127305  | Loss    | 38046  | p25.3 - p21.31  | 25820 |
| M018-PB     | chr3           | 53252950  | 81520610  | Loss    | 28375  | p21.1 - p12.3   | 20707 |
| M018-PB     | chr3           | 81537706  | 89190218  | Gain    | 7653   | p12.3 - p11.2   | 4186  |
| M018-PB     | chr3           | 89190551  | 90327821  | Loss    | 1137   | p11.2 - p11.1   | 652   |
| M018-PB     | chr3           | 93504854  | 197962430 | Gain    | 104541 | q11.2 - q29     | 65301 |
| M018-PB     | chr9           | 119303209 | 119406431 | Gain    | 103    | q33.1           | 90    |
| M018-PB     | chr11          | 76524661  | 107071976 | Loss    | 30375  | q13.5 - q22.3   | 21827 |
| M018-PB     | chr11          | 114337621 | 118753954 | Gain    | 4416   | q23.2 - q23.3   | 3277  |
| M018-PB     | chr11          | 118791727 | 134946516 | Loss    | 16155  | q23.3 - q25     | 12388 |
| M018-PB     | chr13          | 52192230  | 57333147  | Loss    | 5141   | q14.3 - q21.1   | 2881  |
| M018-PB     | chr13          | 57335168  | 67889300  | Gain    | 10554  | q21.1 - q21.32  | 6515  |
| M018-PB     | chr13          | 67906464  | 69569939  | Loss    | 1663   | q21.32 - q21.33 | 1033  |

|         |       |           |           |      |       |                 |       |
|---------|-------|-----------|-----------|------|-------|-----------------|-------|
| M018-PB | chr13 | 69578476  | 75074801  | Gain | 5496  | q21.33 - q22.1  | 3883  |
| M018-PB | chr13 | 75102448  | 78141952  | Loss | 3040  | q22.1 - q22.3   | 2183  |
| M018-PB | chr13 | 78142711  | 85388208  | Gain | 7245  | q22.3 - q31.1   | 4712  |
| M018-PB | chr13 | 85402516  | 89187470  | Loss | 3685  | q31.1 - q31.2   | 2188  |
| M018-PB | chr13 | 89199840  | 100438134 | Gain | 11238 | q31.2 - q32.3   | 7618  |
| M018-PB | chr13 | 100459456 | 115109878 | Loss | 14886 | q32.3 - q34     | 11092 |
| M018-PB | chr14 | 20427715  | 52024134  | Loss | 31596 | q11.2 - q22.1   | 20340 |
| M018-PB | chr14 | 61274088  | 64178171  | Loss | 2904  | q23.1 - q23.2   | 1970  |
| M018-PB | chr17 | 0         | 22263006  | Loss | 22190 | p13.3 - p11.1   | 13449 |
| M018-PB | chr17 | 25343462  | 81060000  | Gain | 56407 | q11.1 - q25.3   | 33117 |
| M018-PB | chr18 | 18510899  | 29689338  | Loss | 11843 | q11.1 - q12.1   | 7012  |
| M018-PB | chr18 | 31206556  | 42356111  | Loss | 11150 | q12.1 - q12.3   | 7307  |
| M018-PB | chr20 | 35902804  | 39794241  | Loss | 3891  | q11.23 - q12    | 2707  |
| M018-PB | chr22 | 38519181  | 39125849  | Loss | 607   | q13.1           | 342   |
| M018-PB | chr22 | 39743177  | 40317912  | Loss | 575   | q13.1           | 294   |
| M018-PB | chr22 | 41870544  | 42878175  | Loss | 1008  | q13.2           | 554   |
| M019-PB |       |           |           |      |       |                 |       |
| M019-PB | chr1  | 49565292  | 111345628 | Loss | 61809 | p33 - p13.3     | 41058 |
| M019-PB | chr1  | 111355396 | 115738454 | Gain | 4383  | p13.3 - p13.2   | 3118  |
| M019-PB | chr1  | 115749096 | 119924040 | Loss | 4175  | p13.2 - p12     | 2738  |
| M019-PB | chr3  | 121590268 | 197962430 | Gain | 76429 | q13.33 - q29    | 48286 |
| M019-PB | chr6  | 131180953 | 171055067 | Loss | 39677 | q23.1 - q27     | 27912 |
| M019-PB | chr8  | 85871765  | 146304022 | Gain | 60241 | q21.2 - q24.3   | 39484 |
| M019-PB | chr11 | 77464144  | 116968043 | Loss | 39331 | q14.1 - q23.3   | 28250 |
| M019-PB | chr12 | 145740    | 14042668  | Loss | 13934 | p13.33 - p13.1  | 9840  |
| M019-PB | chr12 | 14043172  | 44802351  | Gain | 29154 | p13.1 - q12     | 18745 |
| M019-PB | chr12 | 44904486  | 51138863  | Loss | 6234  | q12 - q13.13    | 3487  |
| M019-PB | chr12 | 51230714  | 133779461 | Gain | 82786 | q13.13 - q24.33 | 55044 |
| M019-PB | chr13 | 19092836  | 115070463 | Loss | 96098 | q11 - q34       | 65937 |
| M019-PB | chr15 | 47040178  | 102521392 | Gain | 55511 | q21.1 - q26.3   | 37785 |
| M020-PB |       |           |           |      |       |                 |       |
| M020-PB | chr1  | 92734376  | 106260827 | Loss | 13555 | p22.1 - p21.1   | 8338  |
| M020-PB | chr1  | 202457542 | 204671311 | Gain | 2214  | q32.1           | 1572  |
| M020-PB | chr2  | 3434730   | 3655068   | Gain | 219   | p25.3           | 98    |
| M020-PB | chr5  | 10000     | 43879590  | Gain | 43915 | p15.33 - p12    | 30575 |
| M020-PB | chr7  | 135133619 | 139078666 | Loss | 3945  | q33 - q34       | 2545  |
| M020-PB | chr7  | 139113500 | 145351269 | Gain | 6218  | q34 - q35       | 4176  |
| M020-PB | chr10 | 111558    | 21828550  | Loss | 21767 | p15.3 - p12.31  | 18228 |
| M020-PB | chr10 | 21828550  | 23356686  | Gain | 1528  | p12.31 - p12.2  | 827   |
| M020-PB | chr11 | 69356340  | 69902170  | Gain | 514   | q13.2 - q13.3   | 316   |
| M020-PB | chr13 | 19061608  | 115109878 | Loss | 96183 | q11 - q34       | 65957 |
| M020-PB | chr18 | 59621511  | 61814015  | Gain | 2193  | q21.33 - q22.1  | 1611  |

|         |       |           |           |                 |        |                 |        |
|---------|-------|-----------|-----------|-----------------|--------|-----------------|--------|
| M020-PB | chr19 | 18119733  | 19067475  | Loss            | 948    | p13.11          | 358    |
| M021-PB |       |           |           |                 |        |                 |        |
| M021-PB | chr1  | 49824939  | 49960149  | Loss            | 135    | p33             | 61     |
| M021-PB | chr4  | 146478623 | 146609240 | Gain            | 131    | q31.22          | 77     |
| M021-PB | chr16 | 3602914   | 3813801   | Loss            | 211    | p13.3           | 96     |
| M022-LN |       |           |           |                 |        |                 |        |
| M022-LN | chr1  | 10001     | 109824127 | Loss            | 109626 | p36.33 - p13.3  | 68270  |
| M022-LN | chr3  | 126806952 | 197962430 | Gain            | 71212  | q21.3 - q29     | 44906  |
| M022-LN | chr4  | 39335668  | 40113249  | Loss            | 778    | p14             | 352    |
| M022-LN | chr6  | 153821992 | 154203684 | Gain            | 382    | q25.2           | 292    |
| M022-LN | chr9  | 10001     | 21584421  | Loss            | 21574  | p24.3 - p21.3   | 19801  |
| M022-LN | chr9  | 21626584  | 22352655  | Homozygous Loss | 726    | p21.3           | 522    |
| M022-LN | chr9  | 22361470  | 34310915  | Loss            | 11949  | p21.3 - p13.3   | 8830   |
| M022-LN | chr12 | 145739    | 133779461 | Gain            | 132350 | p13.33 - q24.33 | 87226  |
| M022-LN | chr13 | 44251262  | 84313839  | Loss            | 40063  | q14.11 - q31.1  | 25784  |
| M022-LN | chr13 | 84442270  | 115109878 | Gain            | 30803  | q31.1 - q34     | 21533  |
| M022-LN | chr15 | 20057581  | 49091001  | Loss            | 28561  | q11.1 - q21.1   | 17155  |
| M022-LN | chr16 | 60001     | 35223009  | Gain            | 35081  | p13.3 - p11.1   | 21529  |
| M022-LN | chr16 | 46385801  | 90294753  | Loss            | 43889  | q11.2 - q24.3   | 32649  |
| M022-LN | chr18 | 34401     | 44984531  | Gain            | 43214  | p11.32 - q21.1  | 27874  |
| M022-LN | chr18 | 45014851  | 78016181  | Amplification   | 32848  | q21.1 - q23     | 24176  |
| M022-LN | chr19 | 60000     | 24438612  | Loss            | 24230  | p13.3 - p12     | 11621  |
| M022-LN | chr19 | 35762331  | 59114839  | Gain            | 23357  | q13.12 - q13.43 | 13010  |
| M022-LN | chr20 | 60000     | 25061561  | Gain            | 25010  | p13 - p11.21    | 20057  |
| M022-LN | chr20 | 35091046  | 62949607  | Loss            | 27896  | q11.23 - q13.33 | 20359  |
| M022-LN | chr22 | 16055171  | 21462521  | Gain            | 5357   | q11.1 - q11.21  | 2978   |
| M022-LN | chr22 | 24961984  | 51244566  | Loss            | 26399  | q11.23 - q13.33 | 19283  |
| M022-LN | chr13 | 84412574  | 115109878 | CNN-LOH         | 30832  | q31.1 - q34     | 11728  |
| M022-LN | chr15 | 48682937  | 102521392 | CNN-LOH         | 53869  | q21.1 - q26.3   | 18245  |
| M023-PB |       |           |           |                 |        |                 |        |
| M023-PB | chr3  | 60000     | 197962430 | Gain            | 199502 | p26.3 - q29     | 127688 |
| M023-PB | chr5  | 122961804 | 125425537 | Loss            | 2464   | q23.2           | 1787   |
| M023-PB | chr6  | 103942071 | 143559709 | Loss            | 39553  | q16.3 - q24.2   | 25442  |
| M023-PB | chr10 | 10936883  | 12321770  | Loss            | 1385   | p14 - p13       | 1034   |
| M023-PB | chr12 | 11803438  | 11983144  | Loss            | 180    | p13.2           | 263    |
| M023-LN |       |           |           |                 |        |                 |        |
| M023-LN | chr1  | 81993939  | 115117360 | Loss            | 33152  | p31.1 - p13.2   | 21769  |
| M023-LN | chr3  | 60000     | 197962430 | Gain            | 199502 | p26.3 - q29     | 127688 |
| M023-LN | chr5  | 131025868 | 132118371 | Loss            | 1093   | q31.1           | 636    |
| M023-LN | chr5  | 133725149 | 133947166 | Loss            | 222    | q31.1           | 126    |

|         |                               |           |           |               |       |                 |       |
|---------|-------------------------------|-----------|-----------|---------------|-------|-----------------|-------|
| M023-LN | chr6                          | 103942071 | 143559709 | Loss          | 39553 | q16.3 - q24.2   | 25442 |
| M023-LN | chr8                          | 38408736  | 39086752  | Loss          | 678   | p11.23          | 334   |
| M023-LN | chr3                          | 170169054 | 181957056 | CNN-LOH       | 11788 | q26.2 - q26.33  | 3368  |
| M024-LN |                               |           |           |               |       |                 |       |
| M024-LN | chr7                          | 10238     | 23565889  | Gain          | 23532 | p22.3 - p15.3   | 17319 |
| M024-LN | chr11                         | 92920606  | 116864526 | Loss          | 23809 | q21 - q23.3     | 17224 |
| M024-LN | chr13                         | 112183398 | 115109878 | Loss          | 3162  | q34             | 1395  |
| M024-LN | chr19                         | 60000     | 16388502  | CNN-LOH       | 16213 | p13.3-p13.11    | 2817  |
| M025-LN |                               |           |           |               |       |                 |       |
| M025-LN | chr1                          | 84222669  | 114281587 | Loss          | 30088 | p31.1 - p13.2   | 19739 |
| M025-LN | chr4                          | 5337073   | 24205745  | Gain          | 18427 | p16.1 - p15.2   | 13836 |
| M025-LN | chr5                          | 10000     | 9524825   | Gain          | 9578  | p15.33 - p15.2  | 7963  |
| M025-LN | chr6                          | 128109231 | 160774143 | Loss          | 32543 | q22.33 - q25.3  | 22381 |
| M025-LN | chr6                          | 160802024 | 171055067 | Gain          | 10178 | q25.3 - q27     | 7651  |
| M025-LN | chr8                          | 131948999 | 140601876 | Gain          | 8653  | q24.22 - q24.3  | 7235  |
| M025-LN | chr9                          | 70462156  | 141153431 | Loss          | 70571 | q12 - q34.3     | 49278 |
| M026-PB |                               |           |           |               |       |                 |       |
| M026-PB | chr3                          | 24864378  | 48804598  | Loss          | 23940 | p24.2 - p21.31  | 15834 |
| M026-PB | chr5                          | 10000     | 39498244  | Gain          | 39534 | p15.33 - p13.1  | 27946 |
| M026-PB | chr6                          | 24443851  | 26369485  | Loss          | 1926  | p22.2 - p22.1   | 1360  |
| M026-PB | chr8                          | 79114280  | 146304022 | Gain          | 66998 | q21.12 - q24.3  | 43470 |
| M026-PB | chr9                          | 70626756  | 141153431 | Loss          | 70407 | q12 - q34.3     | 49278 |
| M026-PB | chr11                         | 85993139  | 116616201 | Loss          | 30451 | q14.2 - q23.3   | 21826 |
| M026-PB | chr13                         | 19107653  | 41614720  | Loss          | 22507 | q11 - q14.11    | 16618 |
| M026-PB | chr13                         | 46887803  | 73446141  | Loss          | 26558 | q14.12 - q22.1  | 16585 |
| M026-PB | chr13                         | 73703365  | 85278428  | Gain          | 11575 | q22.1 - q31.1   | 7960  |
| M026-PB | chr13                         | 87774121  | 89561029  | Loss          | 1787  | q31.2           | 994   |
| M026-PB | chr13                         | 90076715  | 92019703  | Loss          | 1943  | q31.3           | 1268  |
| M026-PB | chr13                         | 93673889  | 115109878 | Gain          | 21671 | q31.3 - q34     | 15826 |
| M026-PB | chr17                         | 7257735   | 8340943   | Loss          | 1083  | p13.1           | 519   |
| M026-LN |                               |           |           |               |       |                 |       |
| M026-LN | Same alterations than M026-PB |           |           |               |       |                 |       |
| M027-PB |                               |           |           |               |       |                 |       |
| M027-PB | chr17                         | 0         | 21495013  | Loss          | 21436 | p13.3 - p11.2   | 13190 |
| M028-PB |                               |           |           |               |       |                 |       |
| M028-PB | chr1                          | 10001     | 25897102  | Gain          | 25770 | p36.33 - p36.11 | 14738 |
| M028-PB | chr1                          | 73914793  | 104530894 | Loss          | 30645 | p31.1 - p21.1   | 20009 |
| M028-PB | chr3                          | 9365508   | 9511991   | Amplification | 146   | p25.3           | 85    |
| M028-PB | chr3                          | 9511991   | 16213170  | Gain          | 6701  | p25.3 - p24.3   | 4699  |
| M028-PB | chr3                          | 16732967  | 19824062  | Amplification | 3091  | p24.3           | 1684  |

|         |       |           |           |                 |       |                 |       |
|---------|-------|-----------|-----------|-----------------|-------|-----------------|-------|
| M028-PB | chr3  | 19869590  | 25101200  | Gain            | 5232  | p24.3 - p24.2   | 3864  |
| M028-PB | chr3  | 25101833  | 27954144  | Amplification   | 2852  | p24.2 - p24.1   | 2175  |
| M028-PB | chr3  | 27959843  | 31149972  | Gain            | 3190  | p24.1 - p23     | 2438  |
| M028-PB | chr4  | 127044487 | 177997173 | Gain            | 50970 | q28.1 - q34.3   | 31669 |
| M028-PB | chr4  | 178016782 | 179189691 | Amplification   | 1173  | q34.3           | 852   |
| M028-PB | chr4  | 179194413 | 191029082 | Gain            | 11842 | q34.3 - q35.2   | 8592  |
| M028-PB | chr7  | 138787299 | 142048195 | Amplification   | 3367  | q34             | 2244  |
| M028-PB | chr8  | 128036993 | 129358220 | Gain            | 1321  | q24.21          | 1038  |
| M028-PB | chr9  | 10001     | 38733320  | Loss            | 38723 | p24.3 - p13.1   | 32014 |
| M028-PB | chr10 | 60000     | 16967637  | Gain            | 17008 | p15.3 - p13     | 14651 |
| M028-PB | chr11 | 69022446  | 134946516 | Loss            | 65673 | q13.2 - q25     | 46619 |
| M028-PB | chr12 | 49064967  | 51630527  | Loss            | 2566  | q13.11 - q13.13 | 1201  |
| M028-PB | chr13 | 19020000  | 48893060  | Loss            | 29893 | q11 - q14.2     | 21669 |
| M028-PB | chr13 | 48899012  | 49143747  | Homozygous Loss | 245   | q14.2           | 241   |
| M028-PB | chr13 | 49170671  | 115087164 | Loss            | 66037 | q14.2 - q34     | 44006 |
| M028-PB | chr18 | 23101688  | 78016181  | Gain            | 54761 | q11.2 - q23     | 38626 |
| M028-PB | chr19 | 60000     | 17970312  | Loss            | 17795 | p13.3 - p13.11  | 8066  |
| M028-PB | chr19 | 52079455  | 55378682  | Gain            | 3299  | q13.33 - q13.42 | 2248  |
| M028-PB | chr9  | 70620211  | 141153431 | CNN-LOH         | 70413 | q12 - q34.3     | 24392 |
| M029-PB |       |           |           |                 |       |                 |       |
| M029-PB | chr2  | 231047501 | 231384877 | Loss            | 337   | q37.1           | 204   |
| M029-PB | chr3  | 127274309 | 175125742 | Gain            | 47851 | q21.3 - q26.31  | 30039 |
| M029-PB | chr3  | 175484095 | 197910502 | Gain            | 22428 | q26.31 - q29    | 14307 |
| M029-PB | chr6  | 31135152  | 31957099  | Loss            | 822   | p21.33 - p21.32 | 423   |
| M029-PB | chr9  | 82641048  | 105321734 | Loss            | 22531 | q21.31 - q31.1  | 15834 |
| M029-PB | chr13 | 86660977  | 91685755  | Gain            | 4925  | q31.1 - q31.3   | 2885  |
| M029-PB | chr13 | 91685755  | 93783197  | Amplification   | 2097  | q31.3           | 1446  |
| M029-PB | chr13 | 93783197  | 115109878 | Loss            | 21562 | q31.3 - q34     | 15742 |
| M029-PB | chr19 | 13529277  | 15220189  | Loss            | 1691  | p13.13 - p13.12 | 877   |
| M029-PB | chr19 | 38556539  | 59114839  | Gain            | 20563 | q13.13 - q13.43 | 11525 |
| M029-PB | chr6  | 60000     | 29914882  | CNN-LOH         | 30023 | p25.3 - p21.33  | 12291 |
| M029-PB | chr17 | 0         | 12471864  | CNN-LOH         | 12412 | p13.3-p12       | 3813  |
| M030-PB |       |           |           |                 |       |                 |       |
| M030-PB | chr1  | 73659352  | 117864819 | Loss            | 44234 | p31.1 - p12     | 29241 |
| M030-PB | chr3  | 104168982 | 197680244 | Gain            | 93513 | q13.11 - q29    | 59214 |
| M030-PB | chr11 | 69325821  | 70432310  | Gain            | 1075  | q13.2 - q13.3   | 620   |
| M030-PB | chr9  | 10001     | 36046396  | CNN-LOH         | 36036 | p24.3 - p13.3   | 16071 |
| M030-PB | chr22 | 18361113  | 51244566  | CNN-LOH         | 32950 | q11.21 - q13.33 | 11030 |
| M031-PB |       |           |           |                 |       |                 |       |

|         |                               |           |           |                 |       |                |       |
|---------|-------------------------------|-----------|-----------|-----------------|-------|----------------|-------|
| M031-PB | chr1                          | 63746213  | 105645259 | Loss            | 41928 | p31.3 - p21.1  | 27609 |
| M031-PB | chr2                          | 25380974  | 25847971  | Loss            | 467   | p23.3          | 233   |
| M031-PB | chr2                          | 42924187  | 43983285  | Loss            | 1059  | p21            | 748   |
| M031-PB | chr2                          | 111441265 | 113308818 | Loss            | 1868  | q13            | 940   |
| M031-PB | chr6                          | 55789771  | 70012642  | Loss            | 14172 | p12.1 - q13    | 6504  |
| M031-PB | chr6                          | 72722361  | 76927295  | Amplification   | 4205  | q13 - q14.1    | 2670  |
| M031-PB | chr6                          | 76932144  | 110226668 | Loss            | 33344 | q14.1 - q21    | 21576 |
| M031-PB | chr8                          | 98478588  | 128740542 | Gain            | 30262 | q22.1 - q24.21 | 19530 |
| M031-PB | chr8                          | 129181703 | 146304022 | Gain            | 17024 | q24.21 - q24.3 | 11959 |
| M031-PB | chr9                          | 10001     | 5850933   | Loss            | 5841  | p24.3 - p24.1  | 5978  |
| M031-PB | chr9                          | 5864467   | 7135848   | Amplification   | 1271  | p24.1          | 1007  |
| M031-PB | chr9                          | 7137335   | 11690218  | Gain            | 4553  | p24.1 - p23    | 4378  |
| M031-PB | chr9                          | 11695349  | 21076512  | Loss            | 9381  | p23 - p21.3    | 8004  |
| M031-PB | chr9                          | 21077639  | 21997496  | Homozygous Loss | 920   | p21.3          | 698   |
| M031-PB | chr9                          | 22020740  | 38812793  | Loss            | 16792 | p21.3 - p13.1  | 11932 |
| M031-PB | chr10                         | 86267     | 12620392  | Loss            | 12584 | p15.3 - p13    | 10860 |
| M031-PB | chr13                         | 19045628  | 20544541  | Gain            | 1499  | q11 - q12.11   | 796   |
| M031-PB | chr13                         | 20608233  | 90919918  | Loss            | 70212 | q12.11 - q31.3 | 47489 |
| M031-PB | chr13                         | 90927968  | 98524680  | Amplification   | 7597  | q31.3 - q32.2  | 5155  |
| M031-PB | chr13                         | 98536247  | 115109878 | Loss            | 16799 | q32.2 - q34    | 12476 |
| M031-PB | chr17                         | 74040949  | 74760783  | Loss            | 720   | q25.1 - q25.2  | 418   |
| M031-LN |                               |           |           |                 |       |                |       |
| M031-LN | Same alterations than M031-PB |           |           |                 |       |                |       |

Abbreviations: CNN-LOH, Copy number neutral loss of heterozygosity; LN, lymph node; PB, Peripheral Blood.

\*These samples were obtained 3.2, 3.5 and 5 years after diagnosis, respectively.

**Table S11.** Recurrently mutated genes identified in the 29 MCL analyzed by WES, based on recurrence, gene size and gene coverage.

| Recurrent significant mutated genes ( $P < 0.01$ ) |                                                                        |                  |                      |            |
|----------------------------------------------------|------------------------------------------------------------------------|------------------|----------------------|------------|
| Gene                                               | Case                                                                   | No. of mutations | No. of mutations     | $P$ -value |
| <i>ATM</i> *                                       | M006, M008, M010, M012, M013, M014, M020, M022, M024, M025, M030, M031 | 17               | 12                   | <0.0001    |
| <i>CCND1</i> *                                     | M002, M003, M004, M009, M011, M015, M018, M021, M022, M027             | 12               | 10                   | <0.0001    |
| <i>TP53</i> *                                      | M003, M004, M010, M018, M026, M027, M028, M029                         | 9                | 8                    | <0.0001    |
| <i>WHSC1</i> *                                     | M008, M022, M023, M029                                                 | 4                | 4                    | <0.0001    |
| <i>MLL2</i> *                                      | M002, M012, M024, M030                                                 | 4                | 4                    | 0.0007     |
| <i>BIRC3</i> *                                     | M009, M014, M019                                                       | 3                | 3                    | <0.0001    |
| <i>MEF2B</i>                                       | M012, M013                                                             | 2                | 2                    | 0.0001     |
| <i>CHMP4C</i>                                      | M006, M022                                                             | 2                | 2                    | 0.0001     |
| <i>LUZP4</i>                                       | M010, M024                                                             | 2                | 2                    | 0.0002     |
| <i>RGS4</i>                                        | M007, M029                                                             | 2                | 2                    | 0.0002     |
| <i>PDLIM3</i>                                      | M002, M012                                                             | 2                | 2                    | 0.0003     |
| <i>KCNC2</i>                                       | M009, M031                                                             | 2                | 2                    | 0.0009     |
| <i>SLC17A6</i>                                     | M003, M018                                                             | 2                | 2                    | 0.0010     |
| <i>DCP1B</i>                                       | M024, M028                                                             | 2                | 2                    | 0.0010     |
| <i>PCSK2</i>                                       | M001, M013                                                             | 2                | 2                    | 0.0011     |
| <i>SP140</i>                                       | M025, M028                                                             | 2                | 2                    | 0.0014     |
| <i>TLR2</i>                                        | M003, M021                                                             | 2                | 2                    | 0.0018     |
| <i>TRPM6</i>                                       | M004, M031                                                             | 2                | 2                    | 0.0021     |
| <i>DLGAP2</i>                                      | M007, M014                                                             | 2                | 2                    | 0.0023     |
| <i>DNAJC6</i>                                      | M006, M030                                                             | 2                | 2                    | 0.0024     |
| <i>TNRC6B</i>                                      | M016, M030                                                             | 2                | 2                    | 0.0027     |
| <i>CRYBG3</i>                                      | M014, M030                                                             | 2                | 2                    | 0.0030     |
| <i>ABCA3</i>                                       | M002, M006                                                             | 2                | 2                    | 0.0061     |
| <i>KIAA1671</i>                                    | M010, M030                                                             | 2                | 2                    | 0.0063     |
| <i>ABCC9</i>                                       | M025, M028                                                             | 2                | 2                    | 0.0067     |
| Recurrent non-significant mutated genes            |                                                                        |                  |                      |            |
| Gene                                               | Case                                                                   | No. of mutations | No. of mutated cases | $P$ -value |
| <i>FLNC</i>                                        | M006, M030                                                             | 2                | 2                    | 0.0154     |
| <i>UBR5</i>                                        | M006, M023                                                             | 2                | 2                    | 0.0198     |
| <i>UNC80</i>                                       | M007, M018                                                             | 2                | 2                    | 0.0256     |
| <i>CSMD2</i>                                       | M001, M011                                                             | 2                | 2                    | 0.0285     |
| <i>CSMD3</i>                                       | M024, M028                                                             | 2                | 2                    | 0.0343     |
| <i>LRP1B</i>                                       | M010, M022                                                             | 2                | 2                    | 0.0504     |
| <i>SYNE1</i>                                       | M013, M030                                                             | 2                | 2                    | 0.1498     |
| <i>TTN</i>                                         | M002, M003, M028                                                       | 4                | 3                    | 0.1610     |

\*Genes present in the Cancer Gene Census, all of them in hematologic neoplasms (<http://www.sanger.ac.uk/genetics/CGP/Census/>).



**Table S12.** Significant differentially expressed genes between *WHSC1*-mutated and -unmutated cases.

| ProbeSet     | Gene symbol      | FDR     | Fold-change | ProbeSet     | Gene symbol         | FDR      | Fold-change |
|--------------|------------------|---------|-------------|--------------|---------------------|----------|-------------|
| 228831_s_at  | <i>GNG7</i>      | < 1e-07 | 10.25       | 204669_s_at  | <i>RNF24</i>        | 0.00332  | 0.58        |
| 225802_at    | <i>TOP1MT</i>    | 0.0181  | 2.99        | 210882_s_at  | <i>TRO</i>          | 0.0164   | 0.58        |
| 204285_s_at  | <i>PMAIP1</i>    | 0.00928 | 2.86        | 239162_at    | <i>DAPK1-IT1</i>    | 0.0237   | 0.57        |
| 212311_at    | <i>SELIL3</i>    | 0.00764 | 2.86        | 237105_at    | <i>LOC100506831</i> | 0.00735  | 0.57        |
| 222735_at    | <i>TMEM38B</i>   | 0.0459  | 2.47        | 219451_at    | <i>MSRB2</i>        | 0.0316   | 0.57        |
| 229050_s_at  | <i>SNHG7</i>     | 0.0265  | 1.97        | 234929_s_at  | <i>SPATA7</i>       | 0.00182  | 0.57        |
| 226240_at    | <i>TADA2B</i>    | 0.00191 | 1.97        | 223475_at    | <i>CRISPLD1</i>     | 0.0059   | 0.56        |
| 218494_s_at  | <i>SLC2A4RG</i>  | 0.0181  | 1.95        | 211276_at    | <i>TCEAL2</i>       | 0.00021  | 0.56        |
| 214001_x_at  | <i>RPS10</i>     | 0.0338  | 1.93        | 244334_at    | <i>TRAMIL1</i>      | < 1e-07  | 0.56        |
| 1556389_at   | <i>CNPY3</i>     | 0.0275  | 1.89        | 242592_at    | <i>GPR137C</i>      | 0.0349   | 0.55        |
| 204487_s_at  | <i>KCNQ1</i>     | 0.0426  | 1.85        | 205899_at    | <i>CCNA1</i>        | 0.0237   | 0.54        |
| 205594_at    | <i>ZNF652</i>    | 0.0478  | 1.8         | 242881_x_at  | <i>LOC100506303</i> | 0.0104   | 0.54        |
| 219305_x_at  | <i>FBXO2</i>     | 0.00408 | 1.67        | 242119_at    | <i>PROX1</i>        | < 1e-07  | 0.54        |
| 223318_s_at  | <i>ALKBH7</i>    | 0.0394  | 1.65        | 211602_s_at  | <i>TRPC1</i>        | 0.023    | 0.54        |
| 1558761_a_at | <i>FAM120AOS</i> | 0.0368  | 1.61        | 202133_at    | <i>WWTR1</i>        | 0.000693 | 0.54        |
| 224912_at    | <i>TTC7A</i>     | 0.0365  | 1.61        | 209030_s_at  | <i>CADMI</i>        | 0.0129   | 0.53        |
| 208717_at    | <i>OXA1L</i>     | 0.0353  | 1.56        | 219017_at    | <i>ETNK1</i>        | 0.0334   | 0.53        |
| 238659_at    | <i>KIAA0141</i>  | 0.0455  | 1.54        | 204627_s_at  | <i>ITGB3</i>        | 0.0317   | 0.53        |
| 217925_s_at  | <i>C6orf106</i>  | 0.0241  | 1.49        | 201397_at    | <i>PHGDH</i>        | 0.0308   | 0.53        |
| 209075_s_at  | <i>ISCU</i>      | 0.0342  | 1.48        | 203476_at    | <i>TPBG</i>         | 0.000265 | 0.53        |
| 1569868_s_at | <i>EME2</i>      | 0.0326  | 1.43        | 227415_at    | <i>LOC283508</i>    | 0.0104   | 0.52        |
| 224078_at    | <i>HIATL2</i>    | 0.0178  | 1.4         | 200906_s_at  | <i>PALLD</i>        | 0.00021  | 0.52        |
| 205354_at    | <i>GAMT</i>      | 0.0453  | 1.38        | 225599_s_at  | <i>C8orf83</i>      | 0.00779  | 0.51        |
| 202263_at    | <i>CYB5R1</i>    | 0.0199  | 1.36        | 223854_at    | <i>PCDHB10</i>      | 0.0342   | 0.51        |
| 217399_s_at  | <i>FOXO3</i>     | 0.0355  | 1.27        | 201928_at    | <i>PKP4</i>         | 0.0344   | 0.51        |
| 213944_x_at  | <i>GNA11</i>     | 0.0328  | 1.26        | 227657_at    | <i>RNF150</i>       | 0.000265 | 0.51        |
| 214367_at    | <i>RASGRP2</i>   | 0.0322  | 1.26        | 215047_at    | <i>TRIM58</i>       | 0.0261   | 0.51        |
| 229188_s_at  | <i>ZNRF2</i>     | 0.0308  | 1.26        | 230175_s_at  | <i>DCBLD2</i>       | 0.00451  | 0.5         |
| 1560994_x_at | <i>LOC400590</i> | 0.0199  | 1.25        | 239108_at    | <i>FAR2</i>         | 0.00543  | 0.5         |
| 216119_s_at  | <i>SPEF1</i>     | 0.0322  | 1.25        | 205889_s_at  | <i>JAKMIP2</i>      | 0.000571 | 0.5         |
| 208929_x_at  | <i>RPL13</i>     | 0.0417  | 1.24        | 219510_at    | <i>POLQ</i>         | 0.0444   | 0.5         |
| 217535_at    | <i>FAM49B</i>    | 0.0331  | 1.22        | 1564190_x_at | <i>ZNF519</i>       | 0.0166   | 0.5         |
| 226417_at    | <i>RHOB</i>      | 0.0433  | 1.21        | 208782_at    | <i>FSTL1</i>        | 0.0393   | 0.49        |
| 221325_at    | <i>KCNK13</i>    | 0.0497  | 1.18        | 225450_at    | <i>AMOTL1</i>       | 0.0172   | 0.48        |
| 233344_x_at  | <i>KIAA1875</i>  | 0.0259  | 1.18        | 204127_at    | <i>RFC3</i>         | 0.0322   | 0.48        |
| 231158_x_at  | <i>PTBP1</i>     | 0.0433  | 1.18        | 210102_at    | <i>VWA5A</i>        | 0.013    | 0.48        |
| 204311_at    | <i>ATP1B2</i>    | 0.0172  | 1.16        | 235333_at    | <i>B4GALT6</i>      | 0.0316   | 0.47        |
| 216334_s_at  | <i>CYP2A7P1</i>  | 0.0316  | 1.16        | 227554_at    | <i>MAGI2-AS3</i>    | 0.000265 | 0.47        |
| 216352_x_at  | <i>PCDHGA3</i>   | 0.0489  | 1.16        | 214620_x_at  | <i>PAM</i>          | 0.000265 | 0.47        |
| 233242_at    | <i>WDR73</i>     | 0.0438  | 1.16        | 227542_at    | <i>SOCS6</i>        | 0.0372   | 0.47        |
| 207663_x_at  | <i>GAGE3</i>     | 0.0338  | 1.15        | 203129_s_at  | <i>KIF5C</i>        | < 1e-07  | 0.46        |
| 210498_at    | <i>CLTC</i>      | 0.0444  | 1.13        | 218326_s_at  | <i>LGR4</i>         | 0.00927  | 0.46        |
| 208645_s_at  | <i>RPS14</i>     | 0.0444  | 1.13        | 218676_s_at  | <i>PCTP</i>         | 0.0174   | 0.46        |

|              |              |          |      |              |              |          |      |
|--------------|--------------|----------|------|--------------|--------------|----------|------|
| 200025_s_at  | RPL27        | 0.0308   | 1.12 | 212699_at    | SCAMP5       | 0.0255   | 0.46 |
| 242006_at    | LCA5         | 0.024    | 0.9  | 204324_s_at  | GOLIM4       | 0.0117   | 0.44 |
| 227526_at    | CDON         | 0.0374   | 0.84 | 201063_at    | RCN1         | 0.0424   | 0.44 |
| 1560537_at   | LOC100129662 | 0.0444   | 0.83 | 223740_at    | AGPAT4-IT1   | 0.0218   | 0.43 |
| 209897_s_at  | SLIT2        | 0.0326   | 0.83 | 215046_at    | C2orf67      | 0.0486   | 0.43 |
| 236551_at    | ZNF311       | 0.000114 | 0.82 | 219179_at    | DACT1        | 0.0161   | 0.43 |
| 204455_at    | DST          | 0.0268   | 0.81 | 230060_at    | CDCA7        | 0.0317   | 0.42 |
| 220253_s_at  | LRP12        | 0.0231   | 0.8  | 201219_at    | CTBP2        | 0.0308   | 0.42 |
| 211298_s_at  | ALB          | 0.00664  | 0.79 | 1565786_x_at | FLJ45482     | 0.00104  | 0.42 |
| 1569352_at   | FNIP2        | 0.0308   | 0.79 | 219213_at    | JAM2         | 0.0184   | 0.42 |
| 1556263_s_at | PWRN1        | 0.0322   | 0.79 | 234985_at    | LDLRAD3      | 0.00021  | 0.42 |
| 226863_at    | FAM110C      | 0.0308   | 0.78 | 219693_at    | AGPAT4       | 0.00779  | 0.41 |
| 226145_s_at  | FRAS1        | 0.0286   | 0.78 | 221606_s_at  | HMGN5        | 0.0402   | 0.41 |
| 1557070_at   | LOC100130275 | 0.0406   | 0.78 | 214920_at    | THSD7A       | 0.0368   | 0.41 |
| 1556039_s_at | GPR173       | 0.0172   | 0.77 | 235205_at    | OXR1         | < 1e-07  | 0.4  |
| 233865_at    | NPAS3        | 0.00116  | 0.77 | 205573_s_at  | SNX7         | 0.0199   | 0.4  |
| 226829_at    | AFAPIL2      | 0.0338   | 0.76 | 228086_at    | STK33        | 0.0349   | 0.4  |
| 234992_x_at  | ECT2         | 0.029    | 0.76 | 225288_at    | COL27A1      | 0.00927  | 0.39 |
| 219882_at    | TLL7         | 0.0338   | 0.76 | 230446_at    | LOC100506130 | 0.0149   | 0.39 |
| 226814_at    | ADAMTS9      | 0.0345   | 0.75 | 238605_at    | NOL4         | 0.0393   | 0.39 |
| 241456_at    | FAM78B       | 0.00374  | 0.75 | 202446_s_at  | PLSCR1       | 0.0331   | 0.38 |
| 225474_at    | MAG11        | 0.00155  | 0.75 | 1569323_at   | PTPRG        | 0.0228   | 0.38 |
| 208591_s_at  | PDE3B        | 0.0272   | 0.75 | 214051_at    | TMSB15B      | 0.0299   | 0.38 |
| 1565149_at   | DYNC2H1      | 0.0151   | 0.74 | 215111_s_at  | TSC22D1      | 0.0426   | 0.37 |
| 236112_at    | LOC285548    | 0.00332  | 0.74 | 232398_at    | CCDC150      | 0.00188  | 0.36 |
| 244267_at    | SATB1        | 0.00473  | 0.74 | 229506_at    | PPM1L        | 0.0298   | 0.36 |
| 237167_at    | KIAA1217     | 0.0412   | 0.73 | 205990_s_at  | WNT5A        | 0.0152   | 0.36 |
| 213012_at    | NEDD4        | 0.00829  | 0.73 | 225062_at    | LOC389831    | 0.0118   | 0.35 |
| 207437_at    | NOVA1        | 0.0353   | 0.73 | 221805_at    | NEFL         | 0.0128   | 0.34 |
| 220014_at    | PRR16        | 0.0198   | 0.73 | 226677_at    | ZNF521       | 0.00888  | 0.34 |
| 213325_at    | PVRL3        | 0.00786  | 0.73 | 218694_at    | ARMCX1       | 0.000114 | 0.33 |
| 232226_at    | LRRC4C       | 0.000336 | 0.71 | 213385_at    | CHN2         | 0.00281  | 0.33 |
| 213558_at    | PCLO         | 0.0017   | 0.71 | 235405_at    | GSTA4        | 0.00927  | 0.33 |
| 213283_s_at  | SALL2        | 0.0478   | 0.71 | 221538_s_at  | PLXNA1       | 0.0128   | 0.33 |
| 226569_s_at  | CHTF18       | 0.0321   | 0.7  | 203875_at    | SMARCA1      | 0.0168   | 0.33 |
| 231738_at    | PCDHB7       | 0.0338   | 0.7  | 213110_s_at  | COL4A5       | < 1e-07  | 0.32 |
| 233209_at    | LOC200609    | 0.0372   | 0.69 | 226653_at    | MARK1        | < 1e-07  | 0.32 |
| 228044_at    | SERP2        | 0.0227   | 0.69 | 236337_at    | SYCP2L       | 0.0468   | 0.32 |
| 1569996_at   | ANKRD26P3    | 0.0323   | 0.68 | 224403_at    | FCRL4        | 0.00332  | 0.31 |
| 244324_at    | C18orf54     | 0.0271   | 0.68 | 212636_at    | QKI          | 0.0112   | 0.31 |
| 211555_s_at  | GUCY1B3      | 0.0118   | 0.68 | 203387_s_at  | TBC1D4       | 0.0308   | 0.31 |
| 227088_at    | PDE5A        | 0.00138  | 0.68 | 212771_at    | FAM171A1     | 0.0168   | 0.3  |
| 214063_s_at  | TF           | 0.00137  | 0.68 | 223627_at    | MEX3B        | 0.00345  | 0.3  |
| 232635_at    | CEP128       | 0.0173   | 0.67 | 203000_at    | STMN2        | 0.0086   | 0.3  |
| 205073_at    | CYP2J2       | 0.0012   | 0.67 | 203628_at    | IGFIR        | 0.0424   | 0.29 |
| 205201_at    | GLI3         | 0.0241   | 0.67 | 210852_s_at  | AASS         | < 1e-07  | 0.28 |
| 228579_at    | KCNQ3        | 0.00173  | 0.67 | 228365_at    | CPNE8        | < 1e-07  | 0.27 |
| 226225_at    | MCC          | 0.00121  | 0.67 | 203680_at    | PRKAR2B      | 0.0168   | 0.25 |
| 211987_at    | TOP2B        | 0.0359   | 0.67 | 220231_at    | C7orf16      | 0.00104  | 0.24 |

|                     |                  |          |      |                    |                 |          |       |
|---------------------|------------------|----------|------|--------------------|-----------------|----------|-------|
| <b>210473_s_at</b>  | <i>GPR125</i>    | 0.0218   | 0.66 | <b>206404_at</b>   | <i>FGF9</i>     | 0.00779  | 0.24  |
| <b>1556698_a_at</b> | <i>GPRIN3</i>    | 0.0261   | 0.66 | <b>212192_at</b>   | <i>KCTD12</i>   | 0.0208   | 0.24  |
| <b>226770_at</b>    | <i>MAGI3</i>     | 0.00101  | 0.66 | <b>217894_at</b>   | <i>KCTD3</i>    | < 1e-07  | 0.24  |
| <b>219596_at</b>    | <i>THAP10</i>    | 0.0177   | 0.66 | <b>229331_at</b>   | <i>SPATA18</i>  | 0.000336 | 0.24  |
| <b>226032_at</b>    | <i>CASP2</i>     | 0.0402   | 0.65 | <b>213273_at</b>   | <i>ODZ4</i>     | 0.000961 | 0.23  |
| <b>241627_x_at</b>  | <i>ARHGEF40</i>  | 0.027    | 0.64 | <b>219368_at</b>   | <i>NAPIL2</i>   | < 1e-07  | 0.22  |
| <b>203692_s_at</b>  | <i>E2F3</i>      | 0.0104   | 0.64 | <b>219855_at</b>   | <i>NUDT11</i>   | 0.00384  | 0.22  |
| <b>219522_at</b>    | <i>FJX1</i>      | 0.000114 | 0.64 | <b>242912_at</b>   | <i>POTEM</i>    | < 1e-07  | 0.22  |
| <b>223488_s_at</b>  | <i>GNB4</i>      | 0.00639  | 0.63 | <b>225731_at</b>   | <i>ANKRD50</i>  | < 1e-07  | 0.21  |
| <b>1559826_a_at</b> | <i>LOC401074</i> | 0.000114 | 0.63 | <b>203139_at</b>   | <i>DAPK1</i>    | 0.0141   | 0.2   |
| <b>209124_at</b>    | <i>MYD88</i>     | 0.0437   | 0.63 | <b>226184_at</b>   | <i>FMNL2</i>    | 0.0218   | 0.19  |
| <b>220520_s_at</b>  | <i>NUP62CL</i>   | 0.00927  | 0.63 | <b>226084_at</b>   | <i>MAP1B</i>    | 0.0194   | 0.19  |
| <b>232803_at</b>    | <i>FLJ31958</i>  | 0.0338   | 0.62 | <b>223313_s_at</b> | <i>MAGED4</i>   | 0.012    | 0.17  |
| <b>219338_s_at</b>  | <i>LRRC49</i>    | 0.000497 | 0.62 | <b>226189_at</b>   | <i>ITGB8</i>    | 0.00315  | 0.16  |
| <b>228584_at</b>    | <i>SGCB</i>      | 0.000114 | 0.62 | <b>225745_at</b>   | <i>LRP6</i>     | 0.00195  | 0.16  |
| <b>216195_at</b>    | <i>ANK2</i>      | 0.0496   | 0.61 | <b>229963_at</b>   | <i>BEX5</i>     | 0.000265 | 0.15  |
| <b>205848_at</b>    | <i>GAS2</i>      | 0.0407   | 0.61 | <b>205110_s_at</b> | <i>FGF13</i>    | < 1e-07  | 0.15  |
| <b>225158_at</b>    | <i>GFM1</i>      | 0.0352   | 0.61 | <b>242136_x_at</b> | <i>MGC70870</i> | 0.0113   | 0.15  |
| <b>219287_at</b>    | <i>KCNMB4</i>    | 0.0118   | 0.61 | <b>219355_at</b>   | <i>CXorf57</i>  | 0.0012   | 0.14  |
| <b>215692_s_at</b>  | <i>MPPED2</i>    | 0.00575  | 0.61 | <b>204749_at</b>   | <i>NAPIL3</i>   | < 1e-07  | 0.14  |
| <b>206825_at</b>    | <i>OXTR</i>      | 0.00296  | 0.61 | <b>228494_at</b>   | <i>PPP1R9A</i>  | 0.00138  | 0.14  |
| <b>213119_at</b>    | <i>SLC36A1</i>   | 0.0209   | 0.61 | <b>209732_at</b>   | <i>CLEC2B</i>   | 0.0327   | 0.13  |
| <b>238067_at</b>    | <i>TBC1D8B</i>   | 0.00101  | 0.61 | <b>217975_at</b>   | <i>WBP5</i>     | < 1e-07  | 0.13  |
| <b>235775_at</b>    | <i>TMTC2</i>     | 0.0172   | 0.61 | <b>215017_s_at</b> | <i>FNBPII</i>   | 0.00781  | 0.11  |
| <b>226492_at</b>    | <i>SEMA6D</i>    | 0.00543  | 0.59 | <b>217963_s_at</b> | <i>NGFRAP1</i>  | < 1e-07  | 0.081 |
| <b>204451_at</b>    | <i>FZD1</i>      | 0.00631  | 0.58 | <b>213194_at</b>   | <i>ROBO1</i>    | < 1e-07  | 0.017 |

**Table S13.** Primers used for Sanger sequencing in the validation analysis.

| Gene          | Primer | Exon                    | Sequence (5'-3')            |
|---------------|--------|-------------------------|-----------------------------|
| <i>BIRC3</i>  | F      | 9                       | CTGAAGAAGCAAACCTGCCTTT      |
|               | R      | 9                       | AAGGAAACCAAATTAGGATAAAAAGTT |
| <i>B2M</i>    | F      | 1                       | CTGGCTTGGAGACAGGTGAC        |
|               | R      | 1                       | AGATCCAGCCCTGGACTAGC        |
|               | F      | 2                       | GGGAGAAATCGATGACCAAA        |
|               | R      | 2                       | CATTCCCTGACAATCCCAAT        |
|               | F      | 3                       | TGGGTAGGAACAGCAGCCTA        |
|               | R      | 3                       | CAGTTCCTTTGCCCTCTCTG        |
| <i>DBC1*</i>  | F      | 8                       | TTTCGCAGTAGGGTAGGTAGCC      |
|               | F'     | 8                       | TTTCGCAGTAGGGTAGGTAGCT      |
|               | R      | 8                       | CGAGCAGTTCATCAGCTTTG        |
| <i>MEF2B</i>  | F      | 1                       | CCCCCTGCTAGGAATGTCTT        |
|               | R      | 1                       | TCCCCATCATCTTCTCTCA         |
|               | F      | 2                       | AGTCCCTGGGCTCTGAGAA         |
|               | R      | 2                       | ACCAGCTCAGCCAGAAAGAA        |
|               | F      | 3                       | TGAAGGAAGGAACTGTTTG         |
|               | R      | 3                       | GCCATGCCTGCATTCTC           |
|               | F      | 4-5                     | CCTCACTACGGAGGTGTTT         |
|               | R      | 4-5                     | GTAGAGCTGGGCCCTGA           |
|               | F      | 6-7                     | GAGGACCCTGGGAAAGGAG         |
|               | R      | 6-7                     | GTTTCCCCTCACCTCTCT          |
|               | F      | 8                       | GCGCGTTTTATTTGTGGATA        |
|               | R      | 8                       | GATGGGCAGCTATTTGAGG         |
| <i>NOTCH1</i> | F      | 26                      | ACTGCAAGGACCACTTCAGC        |
|               | R      | 26                      | GTCCATGGGGTCCAGCTC          |
|               | F      | 34-A                    | CGGAGGAGGTTGTAAGTCTG        |
|               | R      | 34-A                    | GGACGGAGACTGCTGGAAC         |
|               | F      | 34-B                    | ATGGCTACCTGTCAGACGTG        |
|               | R      | 34-B                    | TCTCCTGGGGCAGAATAGTG        |
|               | F      | 34-C                    | GAGCTCCTGAGTGGAGAGC         |
|               | R      | 34-C                    | CCTGGCTCTCAGAACTTGCT        |
| <i>NOTCH2</i> | F      | 26                      | TTTGCTGTCTCTGCTTCC          |
|               | R      | 26                      | GCCTTGAAGTTCAGAAACCAA       |
|               | F      | 27                      | TTACCCCATCTCTCCTCCT         |
|               | R      | 27                      | TTTCCCCTTTACACCAGTGC        |
|               | F      | 34-A                    | AGGCACAGCCTATCTGTGGT        |
|               | R      | 34-A                    | GGCATGGTACTCTTGGCACT        |
|               | F      | 34-B                    | CCCAATGGGCAAGAAGTCTA        |
|               | R      | 34-B                    | CACAATGTGGTGGTGGGATA        |
|               | F      | 34-C                    | CATGAAATGCAGCCTTTGG         |
|               | R      | 34-C                    | GGCCATTTCTGGAATCTGGT        |
|               | F      | 34-D                    | AAGGCAGTATTGCCCAACC         |
|               | R      | 34-D                    | TCATTCTCTCCCGGATGAC         |
| <i>TLR2</i>   | F      | 1                       | TGTGAAAATCACCGATGAAAG       |
|               | R      | 1                       | TGTTGTGAAAAGTAAACAAGGAACC   |
| <i>TP53</i>   | F      | 4                       | TGCTCTTTTACCCATCTAC         |
|               | R      | 4                       | ATACGGCCAGGCATTGAAGT        |
|               | F      | 5-6                     | TGTTCACTGTGCCCTGACT         |
|               | R      | 5-6                     | TTAACCCCTCCTCCCAGAGA        |
|               | F      | 8-9                     | TTGGGAGTAGATGGAGCCT         |
|               | R      | 8-9                     | AGTGTTAGACTGGAACTTT         |
|               | F      | 10                      | CAATTGTAAGTGAACCATC         |
|               | R      | 10                      | GGATGAGAATGGAATCCTAT        |
|               | F      | 11                      | AGACCCTCTCACTCATGTGA        |
|               | R      | 11                      | TGACGCACACCTATTGCAAG        |
| <i>WHSC1</i>  | F      | 18                      | GTGTGGTGCCCGTTCTAAGT        |
|               | R      | 18                      | CACAGGGCAAAGTCCAGTTC        |
|               | F      | 19                      | CATGCGATTGCTAACACTTGA       |
| R             | 19     | TCAAACCAAAAAGAGACTCCACA |                             |

F: forward; R: reverse

\*Specific primers with the mutation allele or wild type allele in the forward primer, only used to check the two *cis*-mutations in the same case (M014).

## SUPPLEMENTARY REFERENCES

1. Swerdlow, S., Campo, E., Harris, N., Jaffe, E., Pileri, S., Stein, H., Thiele, J., & Vardiman, J (Eds.). (2008) *WHO Classification of Tumours of Haematopoietic and Lymphoid Tissues*. IARC: Lyon 2008.
2. Hudson TJ et al. (2010) International network of cancer genome projects. *Nature* 464(7291):993-998.
3. Puente XS et al. (2011) Whole-genome sequencing identifies recurrent mutations in chronic lymphocytic leukaemia. *Nature* 475(7354):101-105.
4. Quesada V et al. (2012) Exome sequencing identifies recurrent mutations of the splicing factor SF3B1 gene in chronic lymphocytic leukemia. *Nat Genet* 44(1):47-52.
5. Navarro A et al. (2012) Molecular subsets of mantle cell lymphoma defined by the IGHV mutational status and SOX11 expression have distinct biologic and clinical features. *Cancer Res* 72(20):5307-5316.
6. Nik-Zainal S et al. (2012) Mutational processes molding the genomes of 21 breast cancers. *Cell* 149(5):979-993.
7. Hadzidimitriou A et al. (2011) Is there a role for antigen selection in mantle cell lymphoma? Immunogenetic support from a series of 807 cases. *Blood* 118(11):3088-3095.
8. Rausch T et al. (2012) Genome sequencing of pediatric medulloblastoma links catastrophic DNA rearrangements with TP53 mutations. *Cell* 148(1-2):59-71.
9. Valdes-Mas R, Bea S, Puente DA, Lopez-Otin C, Puente XS (2012) Estimation of copy number alterations from exome sequencing data. *PLoS One* 7(12):e51422.
10. Greiner TC et al. (2006) Mutation and genomic deletion status of ataxia telangiectasia mutated (ATM) and p53 confer specific gene expression profiles in mantle cell lymphoma. *Proc Natl Acad Sci U S A* 103(7):2352-2357.
11. Fang NY et al. (2003) Oligonucleotide microarrays demonstrate the highest frequency of ATM mutations in the mantle cell subtype of lymphoma. *Proc Natl Acad Sci U S A* 100(9):5372-5377.
12. Bullrich F et al. (1999) ATM mutations in B-cell chronic lymphocytic leukemia. *Cancer Res* 59(1):24-27.
13. Schaffner C, Stilgenbauer S, Rappold GA, Dohner H, Lichter P (1999) Somatic ATM mutations indicate a pathogenic role of ATM in B-cell chronic lymphocytic leukemia. *Blood* 94(2):748-753.
14. Stankovic T et al. (1999) Inactivation of ataxia telangiectasia mutated gene in B-cell chronic lymphocytic leukaemia. *Lancet* 353(9146):26-29.

15. Austen B et al. (2005) Mutations in the ATM gene lead to impaired overall and treatment-free survival that is independent of IGVH mutation status in patients with B-CLL. *Blood* 106(9):3175-3182.
16. Guarini A et al. (2012) ATM gene alterations in chronic lymphocytic leukemia patients induce a distinct gene expression profile and predict disease progression. *Haematologica* 97(1):47-55.
17. Mansouri L et al. (2012) Next generation RNA-sequencing in prognostic subsets of chronic lymphocytic leukemia. *Am J Hematol* 87(7):737-740.
18. Ouillette P et al. (2012) Incidence and clinical implications of ATM aberrations in chronic lymphocytic leukemia. *Genes Chromosomes Cancer* 51(12):1125-1132.
19. Skowronska A et al. (2012) Biallelic ATM inactivation significantly reduces survival in patients treated on the United Kingdom Leukemia Research Fund Chronic Lymphocytic Leukemia 4 trial. *J Clin Oncol* 30(36):4524-4532.
20. Kridel R et al. (2012) Whole transcriptome sequencing reveals recurrent NOTCH1 mutations in mantle cell lymphoma. *Blood* 119(9):1963-1971.
21. Shaffer AL et al. (2006) A library of gene expression signatures to illuminate normal and pathological lymphoid biology. *Immunol Rev* 210(1):67-85.
22. Su AI et al. (2004) A gene atlas of the mouse and human protein-encoding transcriptomes. *Proc Natl Acad Sci U S A* 101(16):6062-6067.
23. Cho RJ et al. (2001) Transcriptional regulation and function during the human cell cycle. *Nat Genet* 27(1):48-54.
24. Zhan F et al. (2006) The molecular classification of multiple myeloma. *Blood* 108(6):2020-2028.
25. Martinez-Garcia E et al. (2011) The MMSET histone methyl transferase switches global histone methylation and alters gene expression in t(4;14) multiple myeloma cells. *Blood* 117(1):211-220.
26. Lohr JG et al. (2012) Discovery and prioritization of somatic mutations in diffuse large B-cell lymphoma (DLBCL) by whole-exome sequencing. *Proc Natl Acad Sci U S A* 109(10):3879-3884.
27. Pasqualucci L et al. (2011) Analysis of the coding genome of diffuse large B-cell lymphoma. *Nat Genet* 43(9):830-837.
28. Green MR et al. (2013) Hierarchy in somatic mutations arising during genomic evolution and progression of follicular lymphoma. *Blood* 121(9):1604-1611.
29. Chapman MA et al. (2011) Initial genome sequencing and analysis of multiple myeloma. *Nature* 471(7339):467-472.
30. Morin RD et al. (2011) Frequent mutation of histone-modifying genes in non-Hodgkin lymphoma. *Nature* 476(7360):298-303.

31. Zhang J et al. (2013) Genetic heterogeneity of diffuse large B-cell lymphoma. *Proc Natl Acad Sci U S A* 110(4):1398-1403.
32. Sharma VM et al. (2006) Notch1 contributes to mouse T-cell leukemia by directly inducing the expression of c-myc. *Mol Cell Biol* 26(21):8022-8031.
33. Palomero T et al. (2006) NOTCH1 directly regulates c-MYC and activates a feed-forward-loop transcriptional network promoting leukemic cell growth. *Proc Natl Acad Sci U S A* 103(48):18261-18266.
34. Weng AP et al. (2006) c-Myc is an important direct target of Notch1 in T-cell acute lymphoblastic leukemia/lymphoma. *Genes Dev* 20(15):2096-2109.
35. Weng AP et al. (2003) Growth suppression of pre-T acute lymphoblastic leukemia cells by inhibition of notch signaling. *Mol Cell Biol* 23(2):655-664.
36. Rossi D et al. (2012) The coding genome of splenic marginal zone lymphoma: activation of NOTCH2 and other pathways regulating marginal zone development. *J Exp Med* 209(9):1537-1551.
37. Fabbri G et al. (2011) Analysis of the chronic lymphocytic leukemia coding genome: role of NOTCH1 mutational activation. *J Exp Med* 208(7):1389-1401.
38. Villamor N et al. (2012) NOTCH1 mutations identify a genetic subgroup of chronic lymphocytic leukemia patients with high risk of transformation and poor outcome. *Leukemia* 27(5):1100-1106.
